# Supplementary material for: Local Production of Osteoprotegerin by Osteoblasts Suppresses Bone Resorption
Source: PubMed Central journal article supplement — Cell Rep. Author manuscript; Available in PMC 2020 Sep 16. (PMC7493998; doi:10.1016/j.celrep.2020.108052), 2020-09-08
Supplement: NIHMS1627829-supplement-2.pdf [file NIHMS1627829-supplement-2.pdf]

**Figure 1A, left panel: One-way ANOVA: Femur Cortical Thickness = Genotype : Means, SD, n, paired differences and p-values**

For all results in Figure 1, a One-Way ANOVA model was fitted to the 4 genotypes. Normality and Equal Variance assumptions of the residuals was tested and passed in each case. Pairwise comparisons were adjusted by Tukey procedure and the 'Difference of Differences' contrast was also estimated.

For femur cortical thickness in Figure 1A, left panel, by the Tukey p-values, *Tnfrsf11b*<sup>+/+</sup> has significantly higher values on average than *Tnfrsf11b*<sup>-/-</sup>. *Tnfrsf11b*<sup>-/-</sup> has significantly lower values on average than CD19-Cre (p=0.0003) & CD19-Cre;*Tnfrsf11b*<sup>f/f</sup> (p<0.0001).

The (1-2)-(3-4) difference of differences contrast is also statistically significant (p<0.0001).

| Type     | Test/Level of geno                          | n | Mean | Std Dev | 2nd level of geno                           | Difference of means | p-value | Tukey p-value | Adjusted DSCF p-value (nonparam.) |
|----------|---------------------------------------------|---|------|---------|---------------------------------------------|---------------------|---------|---------------|-----------------------------------|
| Test     | S-W Normality, observed                     | . | .    | .       |                                             | .                   | 0.0150* | .             | .                                 |
| Test     | S-W Normality, residuals                    | . | .    | .       |                                             | .                   | 0.7644  | .             | .                                 |
| Test     | Equal variance test                         | . | .    | .       |                                             | .                   | 0.2453  | .             | .                                 |
| Mean     | A) <i>Tnfrsf11b</i> <sup>+/+</sup>          | 6 | 0.13 | 0.01    |                                             | .                   | .       | .             | .                                 |
| Mean     | B) <i>Tnfrsf11b</i> <sup>-/-</sup>          | 7 | 0.09 | 0.01    |                                             | .                   | .       | .             | .                                 |
| Mean     | C)CD19-Cre                                  | 8 | 0.12 | 0.01    |                                             | .                   | .       | .             | .                                 |
| Mean     | D)CD19-Cre; <i>Tnfrsf11b</i> <sup>f/f</sup> | 8 | 0.12 | 0.01    |                                             | .                   | .       | .             | .                                 |
| Diff     | A) <i>Tnfrsf11b</i> <sup>+/+</sup>          | . | .    | .       | B) <i>Tnfrsf11b</i> <sup>-/-</sup>          | 0.03                | <.0001* | <.0001*       | 0.0354*                           |
| Diff     | A) <i>Tnfrsf11b</i> <sup>+/+</sup>          | . | .    | .       | C)CD19-Cre                                  | 0.01                | 0.1566  | 0.4753        | 0.4449                            |
| Diff     | A) <i>Tnfrsf11b</i> <sup>+/+</sup>          | . | .    | .       | D)CD19-Cre; <i>Tnfrsf11b</i> <sup>f/f</sup> | 0.00                | 0.4009  | 0.8278        | 0.8285                            |
| Diff     | B) <i>Tnfrsf11b</i> <sup>-/-</sup>          | . | .    | .       | C)CD19-Cre                                  | -0.02               | <.0001* | 0.0003*       | 0.0354*                           |
| Diff     | B) <i>Tnfrsf11b</i> <sup>-/-</sup>          | . | .    | .       | D)CD19-Cre; <i>Tnfrsf11b</i> <sup>f/f</sup> | -0.03               | <.0001* | <.0001*       | 0.0354*                           |
| Diff     | C)CD19-Cre                                  | . | .    | .       | D)CD19-Cre; <i>Tnfrsf11b</i> <sup>f/f</sup> | -0.00               | 0.5188  | 0.9130        | 0.8804                            |
| Contrast | (1-2)-(3-4)                                 | . | 0.04 | 0.01    |                                             | .                   | <.0001* | .             | .                                 |

**Figure 1A, right panel: One-way ANOVA: L4 Cortical Thickness = Genotype : Means, SD, n, paired differences and p-values**

For L4 cortical thickness in Figure 1A, right panel, by the Tukey p-values, *Tnfrsf11b*<sup>+/+</sup> has significantly higher values on average than *Tnfrsf11b*<sup>-/-</sup> (p<0.0001). *Tnfrsf11b*<sup>-/-</sup> has significantly lower values on average than CD19-Cre (p<0.0001) & CD19-Cre;*Tnfrsf11b*<sup>f/f</sup> (p<0.0001).

The (1-2)-(3-4) difference of differences contrast is also statistically significant (p<0.0001).

| Type     | Test/Level of geno                          | n | Mean | Std Dev | 2nd level of geno                           | Difference of means | p-value | Tukey p-value | Adjusted DSCF p-value (nonparam.) |
|----------|---------------------------------------------|---|------|---------|---------------------------------------------|---------------------|---------|---------------|-----------------------------------|
| Test     | S-W Normality, observed                     | . | .    | .       |                                             | .                   | 0.0032* | .             | .                                 |
| Test     | S-W Normality, residuals                    | . | .    | .       |                                             | .                   | 0.5427  | .             | .                                 |
| Test     | Equal variance test                         | . | .    | .       |                                             | .                   | 0.5244  | .             | .                                 |
| Mean     | A) <i>Tnfrsf11b</i> <sup>+/+</sup>          | 6 | 0.06 | 0.00    |                                             | .                   | .       | .             | .                                 |
| Mean     | B) <i>Tnfrsf11b</i> <sup>-/-</sup>          | 7 | 0.04 | 0.01    |                                             | .                   | .       | .             | .                                 |
| Mean     | C)CD19-Cre                                  | 8 | 0.05 | 0.00    |                                             | .                   | .       | .             | .                                 |
| Mean     | D)CD19-Cre; <i>Tnfrsf11b</i> <sup>f/f</sup> | 8 | 0.06 | 0.00    |                                             | .                   | .       | .             | .                                 |
| Diff     | A) <i>Tnfrsf11b</i> <sup>+/+</sup>          | . | .    | .       | B) <i>Tnfrsf11b</i> <sup>-/-</sup>          | 0.02                | <.0001* | <.0001*       | 0.0393*                           |
| Diff     | A) <i>Tnfrsf11b</i> <sup>+/+</sup>          | . | .    | .       | C)CD19-Cre                                  | 0.00                | 0.2021  | 0.5654        | 0.5425                            |
| Diff     | A) <i>Tnfrsf11b</i> <sup>+/+</sup>          | . | .    | .       | D)CD19-Cre; <i>Tnfrsf11b</i> <sup>f/f</sup> | 0.00                | 0.7558  | 0.9890        | 0.9974                            |
| Diff     | B) <i>Tnfrsf11b</i> <sup>-/-</sup>          | . | .    | .       | C)CD19-Cre                                  | -0.01               | <.0001* | <.0001*       | 0.0393*                           |
| Diff     | B) <i>Tnfrsf11b</i> <sup>-/-</sup>          | . | .    | .       | D)CD19-Cre; <i>Tnfrsf11b</i> <sup>f/f</sup> | -0.01               | <.0001* | <.0001*       | 0.0393*                           |
| Diff     | C)CD19-Cre                                  | . | .    | .       | D)CD19-Cre; <i>Tnfrsf11b</i> <sup>f/f</sup> | -0.00               | 0.2925  | 0.7074        | 0.8988                            |
| Contrast | (1-2)-(3-4)                                 | . | 0.02 | 0.00    |                                             | .                   | <.0001* | .             | .                                 |

**Figure 1B, left panel: One-way ANOVA: Femur Cancellous BTV = Genotype : Means, SD, n, paired differences and p-values**

For femur cancellous BV/TV in Figure 1B, left panel, by the Tukey p-values, Tnfrsf11b<sup>+/+</sup> has significantly higher values on average than Tnfrsf11b<sup>-/-</sup> (p<0.0001). Tnfrsf11b<sup>-/-</sup> has significantly lower values on average than CD19-Cre (p<0.0001) & CD19-Cre;Tnfrsf11b<sup>f/f</sup> (p<0.0001).

The (1-2)-(3-4) difference of differences contrast is also statistically significant (p<0.0001).

| Type     | Test/Level of geno                  | n | Mean | Std Dev | 2nd level of geno                   | Difference of means | p-value | Tukey p-value | Adjusted DSCF p-value (nonparam.) |
|----------|-------------------------------------|---|------|---------|-------------------------------------|---------------------|---------|---------------|-----------------------------------|
| Test     | S-W Normality, observed             | . | .    | .       |                                     | .                   | 0.0785  | .             | .                                 |
| Test     | S-W Normality, residuals            | . | .    | .       |                                     | .                   | 0.2793  | .             | .                                 |
| Test     | Equal variance test                 | . | .    | .       |                                     | .                   | 0.1724  | .             | .                                 |
| Mean     | A)Tnfrsf11b <sup>+/+</sup>          | 6 | 0.04 | 0.01    |                                     | .                   | .       | .             | .                                 |
| Mean     | B)Tnfrsf11b <sup>-/-</sup>          | 7 | 0.00 | 0.00    |                                     | .                   | .       | .             | .                                 |
| Mean     | C)CD19-Cre                          | 8 | 0.03 | 0.01    |                                     | .                   | .       | .             | .                                 |
| Mean     | D)CD19-Cre;Tnfrsf11b <sup>f/f</sup> | 8 | 0.04 | 0.01    |                                     | .                   | .       | .             | .                                 |
| Diff     | A)Tnfrsf11b <sup>+/+</sup>          | . | .    | .       | B)Tnfrsf11b <sup>-/-</sup>          | 0.04                | <.0001* | <.0001*       | 0.0287*                           |
| Diff     | A)Tnfrsf11b <sup>+/+</sup>          | . | .    | .       | C)CD19-Cre                          | 0.01                | 0.0453* | 0.1783        | 0.5850                            |
| Diff     | A)Tnfrsf11b <sup>+/+</sup>          | . | .    | .       | D)CD19-Cre;Tnfrsf11b <sup>f/f</sup> | 0.00                | 0.5562  | 0.9322        | 0.8660                            |
| Diff     | B)Tnfrsf11b <sup>-/-</sup>          | . | .    | .       | C)CD19-Cre                          | -0.03               | <.0001* | 0.0001*       | 0.0197*                           |
| Diff     | B)Tnfrsf11b <sup>-/-</sup>          | . | .    | .       | D)CD19-Cre;Tnfrsf11b <sup>f/f</sup> | -0.03               | <.0001* | <.0001*       | 0.0197*                           |
| Diff     | C)CD19-Cre                          | . | .    | .       | D)CD19-Cre;Tnfrsf11b <sup>f/f</sup> | -0.01               | 0.1152  | 0.3797        | 0.5850                            |
| Contrast | (1-2)-(3-4)                         | . | 0.05 | 0.01    |                                     | .                   | <.0001* | .             | .                                 |

**Figure 1B, right panel: One-way ANOVA: L4 Cancellous BV/TV = Genotype : Means, SD, n, paired differences and p-values**

For L4 cancellous BV/TV in Figure 1B, right panel, by the Tukey p-values, *Tnfrsf11b*<sup>+/+</sup> has significantly higher values on average than *Tnfrsf11b*<sup>-/-</sup> (p<0.0001), CD19-Cre (p=0.0124), & CD19-Cre;*Tnfrsf11b*<sup>f/f</sup> (p=0.0465). *Tnfrsf11b*<sup>-/-</sup> has significantly lower values on average than CD19-Cre (p<0.0001) & CD19-Cre;*Tnfrsf11b*<sup>f/f</sup> (p<0.0001).

The (1-2)-(3-4) difference of differences contrast is also statistically significant (p<0.0001).

| Type     | Test/Level of geno                          | n | Mean | Std Dev | 2nd level of geno                           | Difference of means | p-value | Tukey p-value | Adjusted DSCF p-value (nonparam.) |
|----------|---------------------------------------------|---|------|---------|---------------------------------------------|---------------------|---------|---------------|-----------------------------------|
| Test     | S-W Normality, observed                     | . | .    | .       |                                             | .                   | 0.0100* | .             | .                                 |
| Test     | S-W Normality, residuals                    | . | .    | .       |                                             | .                   | 0.0712  | .             | .                                 |
| Test     | Equal variance test                         | . | .    | .       |                                             | .                   | 0.1173  | .             | .                                 |
| Mean     | A) <i>Tnfrsf11b</i> <sup>+/+</sup>          | 6 | 0.17 | 0.02    |                                             | .                   | .       | .             | .                                 |
| Mean     | B) <i>Tnfrsf11b</i> <sup>-/-</sup>          | 7 | 0.06 | 0.01    |                                             | .                   | .       | .             | .                                 |
| Mean     | C)CD19-Cre                                  | 8 | 0.14 | 0.01    |                                             | .                   | .       | .             | .                                 |
| Mean     | D)CD19-Cre; <i>Tnfrsf11b</i> <sup>f/f</sup> | 8 | 0.15 | 0.02    |                                             | .                   | .       | .             | .                                 |
| Diff     | A) <i>Tnfrsf11b</i> <sup>+/+</sup>          | . | .    | .       | B) <i>Tnfrsf11b</i> <sup>-/-</sup>          | 0.11                | <.0001* | <.0001*       | 0.0287*                           |
| Diff     | A) <i>Tnfrsf11b</i> <sup>+/+</sup>          | . | .    | .       | C)CD19-Cre                                  | 0.03                | 0.0025* | 0.0124*       | 0.2467                            |
| Diff     | A) <i>Tnfrsf11b</i> <sup>+/+</sup>          | . | .    | .       | D)CD19-Cre; <i>Tnfrsf11b</i> <sup>f/f</sup> | 0.03                | 0.0101* | 0.0465*       | 0.3237                            |
| Diff     | B) <i>Tnfrsf11b</i> <sup>-/-</sup>          | . | .    | .       | C)CD19-Cre                                  | -0.08               | <.0001* | <.0001*       | 0.0197*                           |
| Diff     | B) <i>Tnfrsf11b</i> <sup>-/-</sup>          | . | .    | .       | D)CD19-Cre; <i>Tnfrsf11b</i> <sup>f/f</sup> | -0.09               | <.0001* | <.0001*       | 0.0197*                           |
| Diff     | C)CD19-Cre                                  | . | .    | .       | D)CD19-Cre; <i>Tnfrsf11b</i> <sup>f/f</sup> | -0.01               | 0.5369  | 0.9227        | 0.8353                            |
| Contrast | (1-2)-(3-4)                                 | . | 0.12 | 0.01    |                                             | .                   | <.0001* | .             | .                                 |

**Figure 2A, left panel: One-way ANOVA: Femur Cortical Thickness= Genotype : Means, SD, n, paired differences and p-values**

For all results in Figure 2, a One-Way ANOVA model was fitted to the 4 genotypes. Normality and Equal Variance assumptions of the residuals was tested. Transformations were used when those assumptions failed. Pairwise comparisons were adjusted by Tukey procedure and the 'Difference of Differences' contrast was also estimated.

For Rank-Transformed femur cortical thickness in Figure 2A, left panel, by the Tukey p-values, *Tnfrsf11b*<sup>+/+</sup> has significantly higher values on average than *Dmp1-Cre;Tnfrsf11b*<sup>ε/ε</sup> (p=0.0151). *Tnfrsf11b*<sup>-/-</sup> has significantly lower values on average than *Tnfrsf11b*<sup>ε/ε</sup> (p=0.0002). *Tnfrsf11b*<sup>ε/ε</sup> has significantly higher values on average than *Dmp1-Cre;Tnfrsf11b*<sup>ε/ε</sup> (p=0.0263).

The (1-2)-(3-4) difference of differences contrast is not statistically significant (p=0.3527).

| Type     | Test/Level of geno                         | n | Mean | Std Dev | 2nd level of geno                          | Difference of means | p-value | Tukey p-value | Adjusted DSCF p-value (nonparam.) |
|----------|--------------------------------------------|---|------|---------|--------------------------------------------|---------------------|---------|---------------|-----------------------------------|
| Test     | S-W Normality, observed                    | . | .    | .       |                                            | .                   | 0.5094  | .             | .                                 |
| Test     | S-W Normality, residuals                   | . | .    | .       |                                            | .                   | 0.8187  | .             | .                                 |
| Test     | Equal variance test                        | . | .    | .       |                                            | .                   | 0.5051  | .             | .                                 |
| Mean     | 1) <i>Tnfrsf11b</i> <sup>+/+</sup>         | 6 | 0.13 | 0.01    |                                            | .                   | .       | .             | .                                 |
| Mean     | 2) <i>Tnfrsf11b</i> <sup>-/-</sup>         | 7 | 0.09 | 0.01    |                                            | .                   | .       | .             | .                                 |
| Mean     | 3) <i>Tnfrsf11b</i> <sup>ff</sup>          | 5 | 0.12 | 0.01    |                                            | .                   | .       | .             | .                                 |
| Mean     | 4) <i>Dmp1-Cre;Tnfrsf11b</i> <sup>ff</sup> | 6 | 0.10 | 0.01    |                                            | .                   | .       | .             | .                                 |
| Diff     | 1) <i>Tnfrsf11b</i> <sup>+/+</sup>         | . | .    | .       | 2) <i>Tnfrsf11b</i> <sup>-/-</sup>         | 0.03                | 0.0001* | 0.0006*       | 0.0731                            |
| Diff     | 1) <i>Tnfrsf11b</i> <sup>+/+</sup>         | . | .    | .       | 3) <i>Tnfrsf11b</i> <sup>ff</sup>          | 0.00                | 0.9219  | 0.9996        | 1.0000                            |
| Diff     | 1) <i>Tnfrsf11b</i> <sup>+/+</sup>         | . | .    | .       | 4) <i>Dmp1-Cre;Tnfrsf11b</i> <sup>ff</sup> | 0.02                | 0.0031* | 0.0151*       | 0.0731                            |
| Diff     | 2) <i>Tnfrsf11b</i> <sup>-/-</sup>         | . | .    | .       | 3) <i>Tnfrsf11b</i> <sup>ff</sup>          | -0.03               | 0.0002* | 0.0013*       | 0.0731                            |
| Diff     | 2) <i>Tnfrsf11b</i> <sup>-/-</sup>         | . | .    | .       | 4) <i>Dmp1-Cre;Tnfrsf11b</i> <sup>ff</sup> | -0.01               | 0.2089  | 0.5745        | 0.8993                            |
| Diff     | 3) <i>Tnfrsf11b</i> <sup>ff</sup>          | . | .    | .       | 4) <i>Dmp1-Cre;Tnfrsf11b</i> <sup>ff</sup> | 0.02                | 0.0056* | 0.0263*       | 0.1217                            |
| Contrast | (1-2)-(3-4)                                | . | 0.01 | 0.01    |                                            | .                   | 0.3527  | .             | .                                 |

**Figure 2A, right panel: One-way ANOVA: L4 Cortical Thickness = Genotype : Means, SD, n, paired differences and p-values**

For L4 cortical thickness in Figure 2A, right panel, by the Tukey p-values, *Tnfrsf11b*<sup>+/+</sup> has significantly higher values on average than *Tnfrsf11b*<sup>-/-</sup> (p<0.0001) and *Dmp1-Cre;Tnfrsf11b*<sup>ε/ε</sup> (p=0.0006). *Tnfrsf11b*<sup>-/-</sup> has significantly lower values on average than *Tnfrsf11b*<sup>ε/ε</sup> (p<0.0001). *Tnfrsf11b*<sup>ε/ε</sup> has significantly higher values on average than *Dmp1-Cre;Tnfrsf11b*<sup>ε/ε</sup> (p=0.0025).

The (1-2)-(3-4) difference of differences contrast is not statistically significant (p=0.3242).

| Type     | Test/Level of geno                         | n | Mean | Std Dev | 2nd level of geno                          | Difference of means | p-value | Tukey p-value | Adjusted DSCF p-value (nonparam.) |
|----------|--------------------------------------------|---|------|---------|--------------------------------------------|---------------------|---------|---------------|-----------------------------------|
| Test     | S-W Normality, observed                    | . | .    | .       |                                            | . 0.0214*           | .       | .             | .                                 |
| Test     | S-W Normality, residuals                   | . | .    | .       |                                            | . 0.5163            | .       | .             | .                                 |
| Test     | Equal variance test                        | . | .    | .       |                                            | . 0.3742            | .       | .             | .                                 |
| Mean     | 1) <i>Tnfrsf11b</i> <sup>+/+</sup>         | 6 | 0.06 | 0.00    |                                            | ..                  | .       | .             | .                                 |
| Mean     | 2) <i>Tnfrsf11b</i> <sup>-/-</sup>         | 7 | 0.04 | 0.01    |                                            | ..                  | .       | .             | .                                 |
| Mean     | 3) <i>Tnfrsf11b</i> <sup>ff</sup>          | 5 | 0.06 | 0.00    |                                            | ..                  | .       | .             | .                                 |
| Mean     | 4) <i>Dmp1-Cre;Tnfrsf11b</i> <sup>ff</sup> | 6 | 0.05 | 0.01    |                                            | ..                  | .       | .             | .                                 |
| Diff     | 1) <i>Tnfrsf11b</i> <sup>+/+</sup>         | . | .    | .       | 2) <i>Tnfrsf11b</i> <sup>-/-</sup>         | 0.02                | <.0001* | <.0001*       | 0.0546                            |
| Diff     | 1) <i>Tnfrsf11b</i> <sup>+/+</sup>         | . | .    | .       | 3) <i>Tnfrsf11b</i> <sup>ff</sup>          | 0.00                | 0.7207  | 0.9832        | 0.9433                            |
| Diff     | 1) <i>Tnfrsf11b</i> <sup>+/+</sup>         | . | .    | .       | 4) <i>Dmp1-Cre;Tnfrsf11b</i> <sup>ff</sup> | 0.01                | 0.0001* | 0.0006*       | 0.0546                            |
| Diff     | 2) <i>Tnfrsf11b</i> <sup>-/-</sup>         | . | .    | .       | 3) <i>Tnfrsf11b</i> <sup>ff</sup>          | -0.01               | <.0001* | 0.0002*       | 0.0548                            |
| Diff     | 2) <i>Tnfrsf11b</i> <sup>-/-</sup>         | . | .    | .       | 4) <i>Dmp1-Cre;Tnfrsf11b</i> <sup>ff</sup> | -0.00               | 0.2847  | 0.6940        | 0.9433                            |
| Diff     | 3) <i>Tnfrsf11b</i> <sup>ff</sup>          | . | .    | .       | 4) <i>Dmp1-Cre;Tnfrsf11b</i> <sup>ff</sup> | 0.01                | 0.0005* | 0.0025*       | 0.0548                            |
| Contrast | (1-2)-(3-4)                                | . | 0.00 | 0.00    |                                            | .                   | 0.3242  | .             | .                                 |

**Figure 2B, left panel: One-way ANOVA: Square-root-Transformed Femur Cancellous BV/TV = Genotype : Means, SD, n, paired differences and p-values**

For Square-root-Transformed femur cancellous BV/TV in Figure 2B, left panel, by the Tukey p-values, *Tnfrsf11b*<sup>+/+</sup> has significantly higher values on average than *Tnfrsf11b*<sup>-/-</sup> (p<0.0001) and *Dmp1-Cre;Tnfrsf11b*<sup>f/f</sup> (p=0.0043). *Tnfrsf11b*<sup>-/-</sup> has significantly lower values on average than *Tnfrsf11b*<sup>f/f</sup> (p<0.0001) & *Dmp1-Cre;Tnfrsf11b*<sup>f/f</sup> (p<0.0001). *Tnfrsf11b*<sup>f/f</sup> has significantly higher values on average than *Dmp1-Cre;Tnfrsf11b*<sup>f/f</sup> (p=0.0027).

The (1-2)-(3-4) difference of differences contrast is also statistically significant (p=0.0006).

| Type     | Test/Level of geno                          | n | Mean | Std Dev | 2nd level of geno                           | Difference of means | p-value | Tukey p-value | Adjusted DSCF p-value (nonparam.) |
|----------|---------------------------------------------|---|------|---------|---------------------------------------------|---------------------|---------|---------------|-----------------------------------|
| Test     | S-W Normality, observed                     | . | .    | .       |                                             | . 0.0951            | .       | .             | .                                 |
| Test     | S-W Normality, residuals                    | . | .    | .       |                                             | . 0.8382            | .       | .             | .                                 |
| Test     | Equal variance test                         | . | .    | .       |                                             | . 0.2617            | .       | .             | .                                 |
| Mean     | 1) <i>Tnfrsf11b</i> <sup>+/+</sup>          | 6 | 0.20 | 0.04    |                                             | ..                  | .       | .             | .                                 |
| Mean     | 2) <i>Tnfrsf11b</i> <sup>-/-</sup>          | 7 | 0.04 | 0.02    |                                             | ..                  | .       | .             | .                                 |
| Mean     | 3) <i>Tnfrsf11b</i> <sup>f/f</sup>          | 5 | 0.20 | 0.03    |                                             | ..                  | .       | .             | .                                 |
| Mean     | 4) <i>Dmp1-Cre;Tnfrsf11b</i> <sup>f/f</sup> | 6 | 0.13 | 0.02    |                                             | ..                  | .       | .             | .                                 |
| Diff     | 1) <i>Tnfrsf11b</i> <sup>+/+</sup>          | . | .    | .       | 2) <i>Tnfrsf11b</i> <sup>-/-</sup>          | 0.16                | <.0001* | <.0001*       | 0.0431*                           |
| Diff     | 1) <i>Tnfrsf11b</i> <sup>+/+</sup>          | . | .    | .       | 3) <i>Tnfrsf11b</i> <sup>f/f</sup>          | -0.01               | 0.6992  | 0.9790        | 0.9472                            |
| Diff     | 1) <i>Tnfrsf11b</i> <sup>+/+</sup>          | . | .    | .       | 4) <i>Dmp1-Cre;Tnfrsf11b</i> <sup>f/f</sup> | 0.06                | 0.0008* | 0.0043*       | 0.0920                            |
| Diff     | 2) <i>Tnfrsf11b</i> <sup>-/-</sup>          | . | .    | .       | 3) <i>Tnfrsf11b</i> <sup>f/f</sup>          | -0.17               | <.0001* | <.0001*       | 0.0465*                           |
| Diff     | 2) <i>Tnfrsf11b</i> <sup>-/-</sup>          | . | .    | .       | 4) <i>Dmp1-Cre;Tnfrsf11b</i> <sup>f/f</sup> | -0.10               | <.0001* | <.0001*       | 0.0431*                           |
| Diff     | 3) <i>Tnfrsf11b</i> <sup>f/f</sup>          | . | .    | .       | 4) <i>Dmp1-Cre;Tnfrsf11b</i> <sup>f/f</sup> | 0.07                | 0.0005* | 0.0027*       | 0.0470*                           |
| Contrast | (1-2)-(3-4)                                 | . | 0.09 | 0.02    |                                             | .                   | 0.0006* | .             | .                                 |

**Figure 2B, right panel: One-way ANOVA: L4 Cancellous BV/TV = Genotype : Means, SD, n, paired differences and p-values**

For L4 cancellous BV/TV in Figure 2B, right panel, by the Tukey p-values, *Tnfrsf11b*<sup>+/+</sup> has significantly higher values on average than *Tnfrsf11b*<sup>-/-</sup> ( $p < 0.0001$ ) and *Dmp1-Cre;Tnfrsf11b*<sup>f/f</sup> ( $p < 0.0001$ ). *Tnfrsf11b*<sup>-/-</sup> has significantly lower values on average than *Tnfrsf11b*<sup>f/f</sup> ( $p < 0.0001$ ). *Tnfrsf11b*<sup>f/f</sup> has significantly higher values on average than *Dmp1-Cre;Tnfrsf11b*<sup>f/f</sup> ( $p < 0.0001$ ).

The (1-2)-(3-4) difference of differences contrast is not statistically significant ( $p = 0.0982$ ).

| Type     | Test/Level of geno                          | n | Mean | Std Dev | 2nd level of geno                           | Difference of means | p-value | Tukey p-value | Adjusted DSCF p-value (nonparam.) |
|----------|---------------------------------------------|---|------|---------|---------------------------------------------|---------------------|---------|---------------|-----------------------------------|
| Test     | S-W Normality, observed                     | . | .    | .       |                                             | .                   | 0.0050* | .             | .                                 |
| Test     | S-W Normality, residuals                    | . | .    | .       |                                             | .                   | 0.4319  | .             | .                                 |
| Test     | Equal variance test                         | . | .    | .       |                                             | .                   | 0.1958  | .             | .                                 |
| Mean     | 1) <i>Tnfrsf11b</i> <sup>+/+</sup>          | 6 | 0.17 | 0.02    |                                             | .                   | .       | .             | .                                 |
| Mean     | 2) <i>Tnfrsf11b</i> <sup>-/-</sup>          | 7 | 0.06 | 0.01    |                                             | .                   | .       | .             | .                                 |
| Mean     | 3) <i>Tnfrsf11b</i> <sup>f/f</sup>          | 5 | 0.17 | 0.02    |                                             | .                   | .       | .             | .                                 |
| Mean     | 4) <i>Dmp1-Cre;Tnfrsf11b</i> <sup>f/f</sup> | 9 | 0.08 | 0.01    |                                             | .                   | .       | .             | .                                 |
| Diff     | 1) <i>Tnfrsf11b</i> <sup>+/+</sup>          | . | .    | .       | 2) <i>Tnfrsf11b</i> <sup>-/-</sup>          | 0.11                | <.0001* | <.0001*       | 0.0287*                           |
| Diff     | 1) <i>Tnfrsf11b</i> <sup>+/+</sup>          | . | .    | .       | 3) <i>Tnfrsf11b</i> <sup>f/f</sup>          | 0.00                | 0.9277  | 0.9997        | 0.9834                            |
| Diff     | 1) <i>Tnfrsf11b</i> <sup>+/+</sup>          | . | .    | .       | 4) <i>Dmp1-Cre;Tnfrsf11b</i> <sup>f/f</sup> | 0.09                | <.0001* | <.0001*       | 0.0287*                           |
| Diff     | 2) <i>Tnfrsf11b</i> <sup>-/-</sup>          | . | .    | .       | 3) <i>Tnfrsf11b</i> <sup>f/f</sup>          | -0.11               | <.0001* | <.0001*       | 0.0349*                           |
| Diff     | 2) <i>Tnfrsf11b</i> <sup>-/-</sup>          | . | .    | .       | 4) <i>Dmp1-Cre;Tnfrsf11b</i> <sup>f/f</sup> | -0.02               | 0.0166* | 0.0731        | 0.0742                            |
| Diff     | 3) <i>Tnfrsf11b</i> <sup>f/f</sup>          | . | .    | .       | 4) <i>Dmp1-Cre;Tnfrsf11b</i> <sup>f/f</sup> | 0.09                | <.0001* | <.0001*       | 0.0287*                           |
| Contrast | (1-2)-(3-4)                                 | . | 0.02 | 0.01    |                                             | .                   | 0.0982  | .             | .                                 |



**Figure 2E: One-way ANOVA: Square-root-Transformed Cortical Porosity = Genotype : Means, SD, n, paired differences and p-values**

For Square-root-Transformed cortical porosity in Figure 2E, by the Tukey p-values, Tnfrsf11b<sup>+/+</sup> has significantly lower values on average than Tnfrsf11b<sup>-/-</sup> (p<0.0001). Tnfrsf11b<sup>-/-</sup> has significantly higher values on average than Tnfrsf11b<sup>f/f</sup> (p<0.0001) & Dmp1-Cre;Tnfrsf11b<sup>f/f</sup> (p<0.0001). Tnfrsf11b<sup>f/f</sup> has significantly lower values on average than Dmp1-Cre;Tnfrsf11b<sup>f/f</sup> (p=0.0251).

The (1-2)-(3-4) difference of differences contrast is also statistically significant (p<0.0001).

| Type     | Test/Level of geno                  | n | Mean  | Std Dev | 2nd level of geno                   | Difference of means | p-value | Tukey p-value | Adjusted DSCF p-value (nonparam.) |
|----------|-------------------------------------|---|-------|---------|-------------------------------------|---------------------|---------|---------------|-----------------------------------|
| Test     | S-W Normality, observed             | . | .     | .       |                                     | .                   | 0.0006* | .             | .                                 |
| Test     | S-W Normality, residuals            | . | .     | .       |                                     | .                   | 0.3277  | .             | .                                 |
| Test     | Equal variance test                 | . | .     | .       |                                     | .                   | 0.2502  | .             | .                                 |
| Mean     | 1)Tnfrsf11b <sup>+/+</sup>          | 6 | 0.47  | 0.44    |                                     | .                   | .       | .             | .                                 |
| Mean     | 2)Tnfrsf11b <sup>-/-</sup>          | 7 | 4.14  | 0.72    |                                     | .                   | .       | .             | .                                 |
| Mean     | 3)Tnfrsf11b <sup>f/f</sup>          | 5 | 0.27  | 0.25    |                                     | .                   | .       | .             | .                                 |
| Mean     | 4)Dmp1-Cre;Tnfrsf11b <sup>f/f</sup> | 6 | 1.22  | 0.41    |                                     | .                   | .       | .             | .                                 |
| Diff     | 1)Tnfrsf11b <sup>+/+</sup>          | . | .     | .       | 2)Tnfrsf11b <sup>-/-</sup>          | -3.66               | <.0001* | <.0001*       | 0.0431*                           |
| Diff     | 1)Tnfrsf11b <sup>+/+</sup>          | . | .     | .       | 3)Tnfrsf11b <sup>f/f</sup>          | 0.21                | 0.5043  | 0.9034        | 0.8850                            |
| Diff     | 1)Tnfrsf11b <sup>+/+</sup>          | . | .     | .       | 4)Dmp1-Cre;Tnfrsf11b <sup>f/f</sup> | -0.75               | 0.0184* | 0.0795        | 0.0920                            |
| Diff     | 2)Tnfrsf11b <sup>-/-</sup>          | . | .     | .       | 3)Tnfrsf11b <sup>f/f</sup>          | 3.87                | <.0001* | <.0001*       | 0.0465*                           |
| Diff     | 2)Tnfrsf11b <sup>-/-</sup>          | . | .     | .       | 4)Dmp1-Cre;Tnfrsf11b <sup>f/f</sup> | 2.91                | <.0001* | <.0001*       | 0.0431*                           |
| Diff     | 3)Tnfrsf11b <sup>f/f</sup>          | . | .     | .       | 4)Dmp1-Cre;Tnfrsf11b <sup>f/f</sup> | -0.96               | 0.0053* | 0.0251*       | 0.0470*                           |
| Contrast | (1-2)-(3-4)                         | . | -2.71 | 0.42    |                                     | .                   | <.0001* | .             | .                                 |

**Figure 2F, left panel: One-way ANOVA: Rank-Transformed Serum OPG = Genotype : Means, SD, n, paired differences and p-values**

For Rank-Transformed serum OPG in Figure 2F, left panel, by the Tukey p-values, *Tnfrsf11b*<sup>+/+</sup> has significantly higher values on average than *Tnfrsf11b*<sup>-/-</sup> (p<0.0001). *Tnfrsf11b*<sup>-/-</sup> has significantly lower values on average than *Tnfrsf11b*<sup>f/f</sup> (p=0.0002) and *Dmp1-Cre;Tnfrsf11b*<sup>f/f</sup> (p=0.0008).

The (1-2)-(3-4) difference of differences contrast is also statistically significant (p=0.0097).

| Type     | Test/Level of geno                          | n  | Mean  | Std Dev | 2nd level of geno                           | Difference of means | p-value | Tukey p-value | Adjusted DSCF p-value (nonparam.) |
|----------|---------------------------------------------|----|-------|---------|---------------------------------------------|---------------------|---------|---------------|-----------------------------------|
| Test     | S-W Normality, observed                     | .  | .     | .       |                                             | .                   | 0.0293* | .             | .                                 |
| Test     | S-W Normality, residuals                    | .  | .     | .       |                                             | .                   | 0.2990  | .             | .                                 |
| Test     | Equal variance test                         | .  | .     | .       |                                             | .                   | 0.0453* | .             | .                                 |
| Mean     | 1) <i>Tnfrsf11b</i> <sup>+/+</sup>          | 6  | 19.83 | 7.33    |                                             | .                   | .       | .             | .                                 |
| Mean     | 2) <i>Tnfrsf11b</i> <sup>-/-</sup>          | 7  | 4.00  | 0.00    |                                             | .                   | .       | .             | .                                 |
| Mean     | 3) <i>Tnfrsf11b</i> <sup>f/f</sup>          | 5  | 20.00 | 3.67    |                                             | .                   | .       | .             | .                                 |
| Mean     | 4) <i>Dmp1-Cre;Tnfrsf11b</i> <sup>f/f</sup> | 10 | 15.90 | 6.35    |                                             | .                   | .       | .             | .                                 |
| Diff     | 1) <i>Tnfrsf11b</i> <sup>+/+</sup>          | .  | .     | .       | 2) <i>Tnfrsf11b</i> <sup>-/-</sup>          | 15.83               | <.0001* | 0.0001*       | 0.0166*                           |
| Diff     | 1) <i>Tnfrsf11b</i> <sup>+/+</sup>          | .  | .     | .       | 3) <i>Tnfrsf11b</i> <sup>f/f</sup>          | -0.17               | 0.9594  | 0.9999        | 0.9978                            |
| Diff     | 1) <i>Tnfrsf11b</i> <sup>+/+</sup>          | .  | .     | .       | 4) <i>Dmp1-Cre;Tnfrsf11b</i> <sup>f/f</sup> | 3.93                | 0.1670  | 0.4967        | 0.8387                            |
| Diff     | 2) <i>Tnfrsf11b</i> <sup>-/-</sup>          | .  | .     | .       | 3) <i>Tnfrsf11b</i> <sup>f/f</sup>          | -16.00              | <.0001* | 0.0002*       | 0.0166*                           |
| Diff     | 2) <i>Tnfrsf11b</i> <sup>-/-</sup>          | .  | .     | .       | 4) <i>Dmp1-Cre;Tnfrsf11b</i> <sup>f/f</sup> | -11.90              | 0.0001* | 0.0008*       | 0.0136*                           |
| Diff     | 3) <i>Tnfrsf11b</i> <sup>f/f</sup>          | .  | .     | .       | 4) <i>Dmp1-Cre;Tnfrsf11b</i> <sup>f/f</sup> | 4.10                | 0.1742  | 0.5113        | 0.7991                            |
| Contrast | (1-2)-(3-4)                                 | .  | 11.73 | 4.17    |                                             | .                   | 0.0097* | .             | .                                 |

**Figure 2F, right panel: One-way ANOVA: Square-root-Transformed Serum RANKL = Genotype : Means, SD, n, paired differences and p-values**

For Square-root-Transformed serum RANKL in Figure 2F, right panel, by the Tukey p-values, *Tnfrsf11b*<sup>+/+</sup> has significantly lower values on average than *Tnfrsf11b*<sup>-/-</sup> (p<0.0001) and *Dmp1-Cre;Tnfrsf11b*<sup>f/f</sup> (p=0.0317). *Tnfrsf11b*<sup>-/-</sup> has significantly higher values on average than *Tnfrsf11b*<sup>f/f</sup> (p<0.0001) & *Dmp1-Cre;Tnfrsf11b*<sup>f/f</sup> (p<0.0001).

The (1-2)-(3-4) difference of differences contrast is also statistically significant (p<0.0001).

| Type     | Test/Level of geno                          | n  | Mean   | Std Dev | 2nd level of geno                           | Difference of means | p-value | Tukey p-value | Adjusted DSCF p-value (nonparam.) |
|----------|---------------------------------------------|----|--------|---------|---------------------------------------------|---------------------|---------|---------------|-----------------------------------|
| Test     | S-W Normality, observed                     | .  | .      | .       |                                             | .                   | 0.0001* | .             | .                                 |
| Test     | S-W Normality, residuals                    | .  | .      | .       |                                             | .                   | 0.1181  | .             | .                                 |
| Test     | Equal variance test                         | .  | .      | .       |                                             | .                   | 0.2137  | .             | .                                 |
| Mean     | 1) <i>Tnfrsf11b</i> <sup>+/+</sup>          | 6  | 2.94   | 4.60    |                                             | .                   | .       | .             | .                                 |
| Mean     | 2) <i>Tnfrsf11b</i> <sup>-/-</sup>          | 7  | 48.14  | 2.58    |                                             | .                   | .       | .             | .                                 |
| Mean     | 3) <i>Tnfrsf11b</i> <sup>f/f</sup>          | 5  | 9.40   | 1.10    |                                             | .                   | .       | .             | .                                 |
| Mean     | 4) <i>Dmp1-Cre;Tnfrsf11b</i> <sup>f/f</sup> | 10 | 9.07   | 5.10    |                                             | .                   | .       | .             | .                                 |
| Diff     | 1) <i>Tnfrsf11b</i> <sup>+/+</sup>          | .  | .      | .       | 2) <i>Tnfrsf11b</i> <sup>-/-</sup>          | -45.20              | <.0001* | <.0001*       | 0.0377*                           |
| Diff     | 1) <i>Tnfrsf11b</i> <sup>+/+</sup>          | .  | .      | .       | 3) <i>Tnfrsf11b</i> <sup>f/f</sup>          | -6.46               | 0.0135* | 0.0609        | 0.2015                            |
| Diff     | 1) <i>Tnfrsf11b</i> <sup>+/+</sup>          | .  | .      | .       | 4) <i>Dmp1-Cre;Tnfrsf11b</i> <sup>f/f</sup> | -6.14               | 0.0067* | 0.0317*       | 0.1341                            |
| Diff     | 2) <i>Tnfrsf11b</i> <sup>-/-</sup>          | .  | .      | .       | 3) <i>Tnfrsf11b</i> <sup>f/f</sup>          | 38.74               | <.0001* | <.0001*       | 0.0465*                           |
| Diff     | 2) <i>Tnfrsf11b</i> <sup>-/-</sup>          | .  | .      | .       | 4) <i>Dmp1-Cre;Tnfrsf11b</i> <sup>f/f</sup> | 39.06               | <.0001* | <.0001*       | 0.0212*                           |
| Diff     | 3) <i>Tnfrsf11b</i> <sup>f/f</sup>          | .  | .      | .       | 4) <i>Dmp1-Cre;Tnfrsf11b</i> <sup>f/f</sup> | 0.32                | 0.8834  | 0.9988        | 0.6875                            |
| Contrast | (1-2)-(3-4)                                 | .  | -45.53 | 3.13    |                                             | .                   | <.0001* | .             | .                                 |

**Figure 2G, panel 1: One-way ANOVA: Rank-Transformed *Tnfrsf11b* Gene Expression = Genotype : Means, SD, n, paired differences and p-values**

For all results in Figure 2G, a One-Way ANOVA model was fitted to the 4 genotypes. Normality and Equal Variance assumptions of the residuals was tested. Transformations were used when those assumptions failed. Pairwise comparisons were adjusted by Tukey procedure and the 'Difference of Differences' contrast was also estimated.

For Rank-Transformed *Tnfrsf11b* gene expression in Figure 2G, panel 1, by the Tukey p-values, *Tnfrsf11b*<sup>+/+</sup> has significantly higher values on average than *Tnfrsf11b*<sup>-/-</sup> (p<0.0001) and *Dmp1-Cre;Tnfrsf11b*<sup>ε/ε</sup> (p=0.0006). *Tnfrsf11b*<sup>-/-</sup> has significantly lower values on average than *Tnfrsf11b*<sup>ε/ε</sup> (p<0.0001) & *Dmp1-Cre;Tnfrsf11b*<sup>ε/ε</sup> (p=0.0001). *Tnfrsf11b*<sup>ε/ε</sup> has significantly higher values on average than *Dmp1-Cre;Tnfrsf11b*<sup>ε/ε</sup> (p<0.0001).

The (1-2)-(3-4) difference of differences contrast is also statistically significant (p=0.0230).

| Type     | Test/Level of geno                         | n | Mean  | Std Dev | 2nd level of geno                          | Difference of means | p-value | Tukey p-value | Adjusted DSCF p-value (nonparam.) |
|----------|--------------------------------------------|---|-------|---------|--------------------------------------------|---------------------|---------|---------------|-----------------------------------|
| Test     | S-W Normality, observed                    | . | .     | .       |                                            | . 0.2492            | .       | .             | .                                 |
| Test     | S-W Normality, residuals                   | . | .     | .       |                                            | . 0.7008            | .       | .             | .                                 |
| Test     | Equal variance test                        | . | .     | .       |                                            | . 0.2859            | .       | .             | .                                 |
| Mean     | 1) <i>Tnfrsf11b</i> <sup>+/+</sup>         | 6 | 19.67 | 3.39    |                                            | ..                  | .       | .             | .                                 |
| Mean     | 2) <i>Tnfrsf11b</i> <sup>-/-</sup>         | 6 | 3.50  | 1.76    |                                            | ..                  | .       | .             | .                                 |
| Mean     | 3) <i>Tnfrsf11b</i> <sup>ff</sup>          | 4 | 21.75 | 2.22    |                                            | ..                  | .       | .             | .                                 |
| Mean     | 4) <i>Dmp1-Cre;Tnfrsf11b</i> <sup>ff</sup> | 9 | 11.00 | 2.74    |                                            | ..                  | .       | .             | .                                 |
| Diff     | 1) <i>Tnfrsf11b</i> <sup>+/+</sup>         | . | .     | .       | 2) <i>Tnfrsf11b</i> <sup>-/-</sup>         | 16.17               | <.0001* | <.0001*       | 0.0388*                           |
| Diff     | 1) <i>Tnfrsf11b</i> <sup>+/+</sup>         | . | .     | .       | 3) <i>Tnfrsf11b</i> <sup>ff</sup>          | -2.08               | 0.2369  | 0.6230        | 0.7103                            |
| Diff     | 1) <i>Tnfrsf11b</i> <sup>+/+</sup>         | . | .     | .       | 4) <i>Dmp1-Cre;Tnfrsf11b</i> <sup>ff</sup> | 8.67                | <.0001* | <.0001*       | 0.0239*                           |
| Diff     | 2) <i>Tnfrsf11b</i> <sup>-/-</sup>         | . | .     | .       | 3) <i>Tnfrsf11b</i> <sup>ff</sup>          | -18.25              | <.0001* | <.0001*       | 0.0567                            |
| Diff     | 2) <i>Tnfrsf11b</i> <sup>-/-</sup>         | . | .     | .       | 4) <i>Dmp1-Cre;Tnfrsf11b</i> <sup>ff</sup> | -7.50               | <.0001* | 0.0001*       | 0.0239*                           |
| Diff     | 3) <i>Tnfrsf11b</i> <sup>ff</sup>          | . | .     | .       | 4) <i>Dmp1-Cre;Tnfrsf11b</i> <sup>ff</sup> | 10.75               | <.0001* | <.0001*       | 0.0421*                           |
| Contrast | (1-2)-(3-4)                                | . | 5.42  | 2.21    |                                            | .                   | 0.0230* | .             | .                                 |

**Figure 2G, panel 2: One-way ANOVA: *Tnfsf11* Gene Expression = Genotype : Means, SD, n, paired differences and p-values**

For *Tnfsf11* gene expression in Figure 2G, panel 2, by the Tukey p-values, *Tnfrsf11b<sup>f/f</sup>* has significantly higher values on average than *Dmp1-Cre;Tnfrsf11b<sup>f/f</sup>* (p=0.0273).

The (1-2)-(3-4) difference of differences contrast is not statistically significant (p=0.2810).

| Type     | Test/Level of geno                         | n | Mean | Std Dev | 2nd level of geno                          | Difference of means | p-value | Tukey p-value | Adjusted DSCF p-value (nonparam.) |
|----------|--------------------------------------------|---|------|---------|--------------------------------------------|---------------------|---------|---------------|-----------------------------------|
| Test     | S-W Normality, observed                    | . | .    | .       |                                            | .                   | 0.0320* | .             | .                                 |
| Test     | S-W Normality, residuals                   | . | .    | .       |                                            | .                   | 0.0730  | .             | .                                 |
| Test     | Equal variance test                        | . | .    | .       |                                            | .                   | 0.1136  | .             | .                                 |
| Mean     | 1) <i>Tnfrsf11b<sup>+/+</sup></i>          | 6 | 1.37 | 0.49    |                                            | .                   | .       | .             | .                                 |
| Mean     | 2) <i>Tnfrsf11b<sup>-/-</sup></i>          | 6 | 1.04 | 0.26    |                                            | .                   | .       | .             | .                                 |
| Mean     | 3) <i>Tnfrsf11b<sup>f/f</sup></i>          | 4 | 0.95 | 0.11    |                                            | .                   | .       | .             | .                                 |
| Mean     | 4) <i>Dmp1-Cre;Tnfrsf11b<sup>f/f</sup></i> | 9 | 0.89 | 0.18    |                                            | .                   | .       | .             | .                                 |
| Diff     | 1) <i>Tnfrsf11b<sup>+/+</sup></i>          | . | .    | .       | 2) <i>Tnfrsf11b<sup>-/-</sup></i>          | 0.33                | 0.0693  | 0.2525        | 0.6273                            |
| Diff     | 1) <i>Tnfrsf11b<sup>+/+</sup></i>          | . | .    | .       | 3) <i>Tnfrsf11b<sup>f/f</sup></i>          | 0.42                | 0.0371* | 0.1488        | 0.6273                            |
| Diff     | 1) <i>Tnfrsf11b<sup>+/+</sup></i>          | . | .    | .       | 4) <i>Dmp1-Cre;Tnfrsf11b<sup>f/f</sup></i> | 0.48                | 0.0058* | 0.0273*       | 0.6273                            |
| Diff     | 2) <i>Tnfrsf11b<sup>-/-</sup></i>          | . | .    | .       | 3) <i>Tnfrsf11b<sup>f/f</sup></i>          | 0.10                | 0.6127  | 0.9549        | 0.8290                            |
| Diff     | 2) <i>Tnfrsf11b<sup>-/-</sup></i>          | . | .    | .       | 4) <i>Dmp1-Cre;Tnfrsf11b<sup>f/f</sup></i> | 0.15                | 0.3399  | 0.7641        | 0.6273                            |
| Diff     | 3) <i>Tnfrsf11b<sup>f/f</sup></i>          | . | .    | .       | 4) <i>Dmp1-Cre;Tnfrsf11b<sup>f/f</sup></i> | 0.05                | 0.7638  | 0.9899        | 0.8290                            |
| Contrast | (1-2)-(3-4)                                | . | 0.27 | 0.25    |                                            | .                   | 0.2810  | .             | .                                 |

**Figure 2G, panel 3: One-way ANOVA: TRAP Gene Expression = Genotype : Means, SD, n, paired differences and p-values**

For *TRAP* gene expression in Figure 2G, panel 3, by the Tukey p-values, *Tnfrsf11b*<sup>+/+</sup> has significantly lower values on average than *Tnfrsf11b*<sup>-/-</sup> ( $p < 0.0001$ ) and *Dmp1-Cre;Tnfrsf11b*<sup>f/f</sup> ( $p = 0.0006$ ). *Tnfrsf11b*<sup>-/-</sup> has significantly higher values on average than *Tnfrsf11b*<sup>f/f</sup> ( $p < 0.0001$ ) & *Dmp1-Cre;Tnfrsf11b*<sup>f/f</sup> ( $p < 0.0001$ ). *Tnfrsf11b*<sup>f/f</sup> has significantly lower values on average than *Dmp1-Cre;Tnfrsf11b*<sup>f/f</sup> ( $p < 0.0001$ ).

The (1-2)-(3-4) difference of differences contrast is also statistically significant ( $p = 0.0016$ ).

| Type     | Test/Level of geno                          | n | Mean   | Std Dev | 2nd level of geno                           | Difference of means | p-value | Tukey p-value | Adjusted DSCF p-value (nonparam.) |
|----------|---------------------------------------------|---|--------|---------|---------------------------------------------|---------------------|---------|---------------|-----------------------------------|
| Test     | S-W Normality, observed                     | . | .      | .       |                                             | .                   | 0.0413* | .             | .                                 |
| Test     | S-W Normality, residuals                    | . | .      | .       |                                             | .                   | 0.4045  | .             | .                                 |
| Test     | Equal variance test                         | . | .      | .       |                                             | .                   | 0.5304  | .             | .                                 |
| Mean     | 1) <i>Tnfrsf11b</i> <sup>+/+</sup>          | 6 | 129.67 | 23.39   |                                             | .                   | .       | .             | .                                 |
| Mean     | 2) <i>Tnfrsf11b</i> <sup>-/-</sup>          | 6 | 326.76 | 31.64   |                                             | .                   | .       | .             | .                                 |
| Mean     | 3) <i>Tnfrsf11b</i> <sup>f/f</sup>          | 4 | 102.00 | 13.11   |                                             | .                   | .       | .             | .                                 |
| Mean     | 4) <i>Dmp1-Cre;Tnfrsf11b</i> <sup>f/f</sup> | 9 | 206.50 | 37.75   |                                             | .                   | .       | .             | .                                 |
| Diff     | 1) <i>Tnfrsf11b</i> <sup>+/+</sup>          | . | .      | .       | 2) <i>Tnfrsf11b</i> <sup>-/-</sup>          | -197.09             | <.0001* | <.0001*       | 0.0412*                           |
| Diff     | 1) <i>Tnfrsf11b</i> <sup>+/+</sup>          | . | .      | .       | 3) <i>Tnfrsf11b</i> <sup>f/f</sup>          | 27.67               | 0.1759  | 0.5126        | 0.3207                            |
| Diff     | 1) <i>Tnfrsf11b</i> <sup>+/+</sup>          | . | .      | .       | 4) <i>Dmp1-Cre;Tnfrsf11b</i> <sup>f/f</sup> | -76.84              | 0.0001* | 0.0006*       | 0.0352*                           |
| Diff     | 2) <i>Tnfrsf11b</i> <sup>-/-</sup>          | . | .      | .       | 3) <i>Tnfrsf11b</i> <sup>f/f</sup>          | 224.76              | <.0001* | <.0001*       | 0.0617                            |
| Diff     | 2) <i>Tnfrsf11b</i> <sup>-/-</sup>          | . | .      | .       | 4) <i>Dmp1-Cre;Tnfrsf11b</i> <sup>f/f</sup> | 120.25              | <.0001* | <.0001*       | 0.0352*                           |
| Diff     | 3) <i>Tnfrsf11b</i> <sup>f/f</sup>          | . | .      | .       | 4) <i>Dmp1-Cre;Tnfrsf11b</i> <sup>f/f</sup> | -104.51             | <.0001* | <.0001*       | 0.0421*                           |
| Contrast | (1-2)-(3-4)                                 | . | -92.59 | 25.50   |                                             | .                   | 0.0016* | .             | .                                 |

**Figure 2G, panel 4: One-way ANOVA: CTSK Gene Expression = Genotype : Means, SD, n, paired differences and p-values**

For *CTSK* gene expression in Figure 2G, panel 4, by the Tukey p-values, *Tnfrsf11b*<sup>+/+</sup> has significantly lower values on average than *Tnfrsf11b*<sup>-/-</sup> (p<0.0001) and *Dmp1-Cre;Tnfrsf11b*<sup>f/f</sup> (p=0.0006). *Tnfrsf11b*<sup>-/-</sup> has significantly higher values on average than *Tnfrsf11b*<sup>f/f</sup> (p<0.0001) & *Dmp1-Cre;Tnfrsf11b*<sup>f/f</sup> (p<0.0001). *Tnfrsf11b*<sup>f/f</sup> has significantly lower values on average than *Dmp1-Cre;Tnfrsf11b*<sup>f/f</sup> (p<0.0001).

The (1-2)-(3-4) difference of differences contrast is also statistically significant (p=0.0002).

| Type     | Test/Level of geno                          | n | Mean    | Std Dev | 2nd level of geno                           | Difference of means | p-value | Tukey p-value | Adjusted DSCF p-value (nonparam.) |
|----------|---------------------------------------------|---|---------|---------|---------------------------------------------|---------------------|---------|---------------|-----------------------------------|
| Test     | S-W Normality, observed                     | . | .       | .       |                                             | .                   | 0.0440* | .             | .                                 |
| Test     | S-W Normality, residuals                    | . | .       | .       |                                             | .                   | 0.5932  | .             | .                                 |
| Test     | Equal variance test                         | . | .       | .       |                                             | .                   | 0.0811  | .             | .                                 |
| Mean     | 1) <i>Tnfrsf11b</i> <sup>+/+</sup>          | 6 | 122.88  | 30.31   |                                             | .                   | .       | .             | .                                 |
| Mean     | 2) <i>Tnfrsf11b</i> <sup>-/-</sup>          | 6 | 335.79  | 38.85   |                                             | .                   | .       | .             | .                                 |
| Mean     | 3) <i>Tnfrsf11b</i> <sup>f/f</sup>          | 4 | 104.04  | 8.31    |                                             | .                   | .       | .             | .                                 |
| Mean     | 4) <i>Dmp1-Cre;Tnfrsf11b</i> <sup>f/f</sup> | 9 | 208.44  | 23.93   |                                             | .                   | .       | .             | .                                 |
| Diff     | 1) <i>Tnfrsf11b</i> <sup>+/+</sup>          | . | .       | .       | 2) <i>Tnfrsf11b</i> <sup>-/-</sup>          | -212.91             | <.0001* | <.0001*       | 0.0412*                           |
| Diff     | 1) <i>Tnfrsf11b</i> <sup>+/+</sup>          | . | .       | .       | 3) <i>Tnfrsf11b</i> <sup>f/f</sup>          | 18.83               | 0.3158  | 0.7354        | 0.8290                            |
| Diff     | 1) <i>Tnfrsf11b</i> <sup>+/+</sup>          | . | .       | .       | 4) <i>Dmp1-Cre;Tnfrsf11b</i> <sup>f/f</sup> | -85.56              | <.0001* | <.0001*       | 0.0239*                           |
| Diff     | 2) <i>Tnfrsf11b</i> <sup>-/-</sup>          | . | .       | .       | 3) <i>Tnfrsf11b</i> <sup>f/f</sup>          | 231.75              | <.0001* | <.0001*       | 0.0617                            |
| Diff     | 2) <i>Tnfrsf11b</i> <sup>-/-</sup>          | . | .       | .       | 4) <i>Dmp1-Cre;Tnfrsf11b</i> <sup>f/f</sup> | 127.35              | <.0001* | <.0001*       | 0.0239*                           |
| Diff     | 3) <i>Tnfrsf11b</i> <sup>f/f</sup>          | . | .       | .       | 4) <i>Dmp1-Cre;Tnfrsf11b</i> <sup>f/f</sup> | -104.40             | <.0001* | <.0001*       | 0.0421*                           |
| Contrast | (1-2)-(3-4)                                 | . | -108.52 | 23.66   |                                             | .                   | 0.0002* | .             | .                                 |

**Figure 3A, left panel: One-way ANOVA: Femur Cortical Thickness = Genotype : Means, SD, n, paired differences and p-values**

For all results in Figure 3, a One-Way ANOVA model was fitted to the 4 genotypes. Normality and Equal Variance assumptions of the residuals was tested. Transformations were used when those assumptions failed. Pairwise comparisons were adjusted by Tukey procedure and the 'Difference of Differences' contrast was also estimated.

For femur cortical thickness in Figure 3A, left panel, by the Tukey p-values, *Tnfrsf11b*<sup>+/+</sup> has significantly higher values on average than *Tnfrsf11b*<sup>-/-</sup> (p<0.0001). *Tnfrsf11b*<sup>-/-</sup> has significantly lower values on average than *Tnfrsf11b*<sup>f/f</sup> (p<0.0001) & *SOST-Cre;Tnfrsf11b*<sup>f/f</sup> (p=0.0017).

The (1-2)-(3-4) difference of differences contrast is also statistically significant (p=0.0179).

| Type     | Test/Level of geno                          | n | Mean | Std Dev | 2nd level of geno                           | Difference of means | p-value | Tukey p-value | Adjusted DSCF p-value (nonparam.) |
|----------|---------------------------------------------|---|------|---------|---------------------------------------------|---------------------|---------|---------------|-----------------------------------|
| Test     | S-W Normality, observed                     | . | .    | .       |                                             | .                   | 0.0374* | .             | .                                 |
| Test     | S-W Normality, residuals                    | . | .    | .       |                                             | .                   | 0.1819  | .             | .                                 |
| Test     | Equal variance test                         | . | .    | .       |                                             | .                   | 0.1673  | .             | .                                 |
| Mean     | 1) <i>Tnfrsf11b</i> <sup>+/+</sup>          | 6 | 0.13 | 0.01    |                                             | .                   | .       | .             | .                                 |
| Mean     | 2) <i>Tnfrsf11b</i> <sup>-/-</sup>          | 7 | 0.09 | 0.01    |                                             | .                   | .       | .             | .                                 |
| Mean     | 3) <i>Tnfrsf11b</i> <sup>f/f</sup>          | 6 | 0.13 | 0.00    |                                             | .                   | .       | .             | .                                 |
| Mean     | 4) <i>Sost-Cre;Tnfrsf11b</i> <sup>f/f</sup> | 6 | 0.12 | 0.01    |                                             | .                   | .       | .             | .                                 |
| Diff     | 1) <i>Tnfrsf11b</i> <sup>+/+</sup>          | . | .    | .       | 2) <i>Tnfrsf11b</i> <sup>-/-</sup>          | 0.03                | <.0001* | <.0001*       | 0.0531                            |
| Diff     | 1) <i>Tnfrsf11b</i> <sup>+/+</sup>          | . | .    | .       | 3) <i>Tnfrsf11b</i> <sup>f/f</sup>          | -0.00               | 0.5745  | 0.9398        | 0.8141                            |
| Diff     | 1) <i>Tnfrsf11b</i> <sup>+/+</sup>          | . | .    | .       | 4) <i>Sost-Cre;Tnfrsf11b</i> <sup>f/f</sup> | 0.01                | 0.1018  | 0.3432        | 0.2577                            |
| Diff     | 2) <i>Tnfrsf11b</i> <sup>-/-</sup>          | . | .    | .       | 3) <i>Tnfrsf11b</i> <sup>f/f</sup>          | -0.04               | <.0001* | <.0001*       | 0.0531                            |
| Diff     | 2) <i>Tnfrsf11b</i> <sup>-/-</sup>          | . | .    | .       | 4) <i>Sost-Cre;Tnfrsf11b</i> <sup>f/f</sup> | -0.02               | 0.0003* | 0.0017*       | 0.0883                            |
| Diff     | 3) <i>Tnfrsf11b</i> <sup>f/f</sup>          | . | .    | .       | 4) <i>Sost-Cre;Tnfrsf11b</i> <sup>f/f</sup> | 0.01                | 0.0331* | 0.1346        | 0.0801                            |
| Contrast | (1-2)-(3-4)                                 | . | 0.02 | 0.01    |                                             | .                   | 0.0179* | .             | .                                 |



**Figure 3A, right panel: One-way ANOVA: L4 Cortical Thickness = Genotype : Means, SD, n, paired differences and p-values**

For L4 cortical thickness in Figure 3A, right panel, by the Tukey p-values, Tnfrsf11b<sup>+/+</sup> has significantly higher values on average than Tnfrsf11b<sup>-/-</sup> (p<0.0001). Tnfrsf11b<sup>-/-</sup> has significantly lower values on average than Tnfrsf11b<sup>f/f</sup> (p<0.0001) & SOST-Cre;Tnfrsf11b<sup>f/f</sup> (p=0.0002).

The (1-2)-(3-4) difference of differences contrast is also statistically significant (p=0.0061).

| Type     | Test/Level of geno                  | n | Mean | Std Dev | 2nd level of geno                   | Difference of means | p-value | Tukey p-value | Adjusted DSCF p-value (nonparam.) |
|----------|-------------------------------------|---|------|---------|-------------------------------------|---------------------|---------|---------------|-----------------------------------|
| Test     | S-W Normality, observed             | . | .    | .       |                                     | .                   | 0.0268* | .             | .                                 |
| Test     | S-W Normality, residuals            | . | .    | .       |                                     | .                   | 0.0657  | .             | .                                 |
| Test     | Equal variance test                 | . | .    | .       |                                     | .                   | 0.5629  | .             | .                                 |
| Mean     | 1)Tnfrsf11b <sup>+/+</sup>          | 6 | 0.06 | 0.00    |                                     | .                   | .       | .             | .                                 |
| Mean     | 2)Tnfrsf11b <sup>-/-</sup>          | 7 | 0.04 | 0.01    |                                     | .                   | .       | .             | .                                 |
| Mean     | 3)Tnfrsf11b <sup>f/f</sup>          | 6 | 0.06 | 0.00    |                                     | .                   | .       | .             | .                                 |
| Mean     | 4)Sost-Cre;Tnfrsf11b <sup>f/f</sup> | 6 | 0.06 | 0.01    |                                     | .                   | .       | .             | .                                 |
| Diff     | 1)Tnfrsf11b <sup>+/+</sup>          | . | .    | .       | 2)Tnfrsf11b <sup>-/-</sup>          | 0.02                | <.0001* | <.0001*       | 0.0498*                           |
| Diff     | 1)Tnfrsf11b <sup>+/+</sup>          | . | .    | .       | 3)Tnfrsf11b <sup>f/f</sup>          | -0.00               | 0.4185  | 0.8419        | 0.8863                            |
| Diff     | 1)Tnfrsf11b <sup>+/+</sup>          | . | .    | .       | 4)Sost-Cre;Tnfrsf11b <sup>f/f</sup> | 0.00                | 0.4547  | 0.8706        | 0.7281                            |
| Diff     | 2)Tnfrsf11b <sup>-/-</sup>          | . | .    | .       | 3)Tnfrsf11b <sup>f/f</sup>          | -0.02               | <.0001* | <.0001*       | 0.0498*                           |
| Diff     | 2)Tnfrsf11b <sup>-/-</sup>          | . | .    | .       | 4)Sost-Cre;Tnfrsf11b <sup>f/f</sup> | -0.01               | <.0001* | 0.0002*       | 0.0637                            |
| Diff     | 3)Tnfrsf11b <sup>f/f</sup>          | . | .    | .       | 4)Sost-Cre;Tnfrsf11b <sup>f/f</sup> | 0.00                | 0.1275  | 0.4070        | 0.7281                            |
| Contrast | (1-2)-(3-4)                         | . | 0.01 | 0.00    |                                     | .                   | 0.0061* | .             | .                                 |

**Figure 3B, left panel: One-way ANOVA: Square Root-Transformed Femur Cancellous BV/TV = Genotype : Means, SD, n, paired differences and p-values**

For Square Root-Transformed femur cancellous BV/TV in Figure 3B, left panel, by the Tukey p-values, *Tnfrsf11b*<sup>+/+</sup> has significantly higher values on average than *Tnfrsf11b*<sup>-/-</sup> (p<0.0001). *Tnfrsf11b*<sup>-/-</sup> has significantly lower values on average than *Tnfrsf11b*<sup>f/f</sup> (p<0.0001) & *SOST-Cre;Tnfrsf11b*<sup>f/f</sup> (p<0.0001).

The (1-2)-(3-4) difference of differences contrast is also statistically significant (p<0.0001).

| Type     | Test/Level of geno                          | n | Mean | Std Dev | 2nd level of geno                           | Difference of means | p-value | Tukey p-value | Adjusted DSCF p-value (nonparam.) |
|----------|---------------------------------------------|---|------|---------|---------------------------------------------|---------------------|---------|---------------|-----------------------------------|
| Test     | S-W Normality, observed                     | . | .    | .       |                                             | .                   | 0.0004* | .             | .                                 |
| Test     | S-W Normality, residuals                    | . | .    | .       |                                             | .                   | 0.7609  | .             | .                                 |
| Test     | Equal variance test                         | . | .    | .       |                                             | .                   | 0.1448  | .             | .                                 |
| Mean     | 1) <i>Tnfrsf11b</i> <sup>+/+</sup>          | 6 | 0.20 | 0.04    |                                             | .                   | .       | .             | .                                 |
| Mean     | 2) <i>Tnfrsf11b</i> <sup>-/-</sup>          | 7 | 0.04 | 0.02    |                                             | .                   | .       | .             | .                                 |
| Mean     | 3) <i>Tnfrsf11b</i> <sup>f/f</sup>          | 6 | 0.21 | 0.03    |                                             | .                   | .       | .             | .                                 |
| Mean     | 4) <i>Sost-Cre;Tnfrsf11b</i> <sup>f/f</sup> | 6 | 0.20 | 0.01    |                                             | .                   | .       | .             | .                                 |
| Diff     | 1) <i>Tnfrsf11b</i> <sup>+/+</sup>          | . | .    | .       | 2) <i>Tnfrsf11b</i> <sup>-/-</sup>          | 0.16                | <.0001* | <.0001*       | 0.0287*                           |
| Diff     | 1) <i>Tnfrsf11b</i> <sup>+/+</sup>          | . | .    | .       | 3) <i>Tnfrsf11b</i> <sup>f/f</sup>          | -0.01               | 0.5140  | 0.9094        | 0.9886                            |
| Diff     | 1) <i>Tnfrsf11b</i> <sup>+/+</sup>          | . | .    | .       | 4) <i>Sost-Cre;Tnfrsf11b</i> <sup>f/f</sup> | -0.00               | 0.7624  | 0.9897        | 0.9886                            |
| Diff     | 2) <i>Tnfrsf11b</i> <sup>-/-</sup>          | . | .    | .       | 3) <i>Tnfrsf11b</i> <sup>f/f</sup>          | -0.17               | <.0001* | <.0001*       | 0.0287*                           |
| Diff     | 2) <i>Tnfrsf11b</i> <sup>-/-</sup>          | . | .    | .       | 4) <i>Sost-Cre;Tnfrsf11b</i> <sup>f/f</sup> | -0.17               | <.0001* | <.0001*       | 0.0287*                           |
| Diff     | 3) <i>Tnfrsf11b</i> <sup>f/f</sup>          | . | .    | .       | 4) <i>Sost-Cre;Tnfrsf11b</i> <sup>f/f</sup> | 0.01                | 0.7242  | 0.9839        | 0.9886                            |
| Contrast | (1-2)-(3-4)                                 | . | 0.15 | 0.02    |                                             | .                   | <.0001* | .             | .                                 |

**Figure 3B, right panel: One-way ANOVA: L4 Cancellous BV/TV = Genotype : Means, SD, n, paired differences and p-values**

For L4 cancellous BV/TV in Figure 3B, right panel, by the Tukey p-values, *Tnfrsf11b*<sup>+/+</sup> has significantly higher values on average than *Tnfrsf11b*<sup>-/-</sup> (p<0.0001) and *SOST-Cre;Tnfrsf11b*<sup>f/f</sup> (p=0.0050). *Tnfrsf11b*<sup>-/-</sup> has significantly lower values on average than *Tnfrsf11b*<sup>f/f</sup> (p<0.0001) & *SOST-Cre;Tnfrsf11b*<sup>f/f</sup> (p<0.0001).

The (1-2)-(3-4) difference of differences contrast is also statistically significant (p<0.0001).

| Type     | Test/Level of geno                          | n | Mean | Std Dev | 2nd level of geno                           | Difference of means | p-value | Tukey p-value | Adjusted DSCF p-value (nonparam.) |
|----------|---------------------------------------------|---|------|---------|---------------------------------------------|---------------------|---------|---------------|-----------------------------------|
| Test     | S-W Normality, observed                     | . | .    | .       |                                             | .                   | 0.0118* | .             | .                                 |
| Test     | S-W Normality, residuals                    | . | .    | .       |                                             | .                   | 0.3803  | .             | .                                 |
| Test     | Equal variance test                         | . | .    | .       |                                             | .                   | 0.1129  | .             | .                                 |
| Mean     | 1) <i>Tnfrsf11b</i> <sup>+/+</sup>          | 6 | 0.17 | 0.02    |                                             | .                   | .       | .             | .                                 |
| Mean     | 2) <i>Tnfrsf11b</i> <sup>-/-</sup>          | 7 | 0.06 | 0.01    |                                             | .                   | .       | .             | .                                 |
| Mean     | 3) <i>Tnfrsf11b</i> <sup>f/f</sup>          | 6 | 0.16 | 0.01    |                                             | .                   | .       | .             | .                                 |
| Mean     | 4) <i>Sost-Cre;Tnfrsf11b</i> <sup>f/f</sup> | 6 | 0.14 | 0.01    |                                             | .                   | .       | .             | .                                 |
| Diff     | 1) <i>Tnfrsf11b</i> <sup>+/+</sup>          | . | .    | .       | 2) <i>Tnfrsf11b</i> <sup>-/-</sup>          | 0.11                | <.0001* | <.0001*       | 0.0287*                           |
| Diff     | 1) <i>Tnfrsf11b</i> <sup>+/+</sup>          | . | .    | .       | 3) <i>Tnfrsf11b</i> <sup>f/f</sup>          | 0.02                | 0.0651  | 0.2397        | 0.5224                            |
| Diff     | 1) <i>Tnfrsf11b</i> <sup>+/+</sup>          | . | .    | .       | 4) <i>Sost-Cre;Tnfrsf11b</i> <sup>f/f</sup> | 0.04                | 0.0010* | 0.0050*       | 0.1682                            |
| Diff     | 2) <i>Tnfrsf11b</i> <sup>-/-</sup>          | . | .    | .       | 3) <i>Tnfrsf11b</i> <sup>f/f</sup>          | -0.10               | <.0001* | <.0001*       | 0.0287*                           |
| Diff     | 2) <i>Tnfrsf11b</i> <sup>-/-</sup>          | . | .    | .       | 4) <i>Sost-Cre;Tnfrsf11b</i> <sup>f/f</sup> | -0.08               | <.0001* | <.0001*       | 0.0287*                           |
| Diff     | 3) <i>Tnfrsf11b</i> <sup>f/f</sup>          | . | .    | .       | 4) <i>Sost-Cre;Tnfrsf11b</i> <sup>f/f</sup> | 0.02                | 0.0739  | 0.2660        | 0.1909                            |
| Contrast | (1-2)-(3-4)                                 | . | 0.10 | 0.01    |                                             | .                   | <.0001* | .             | .                                 |

**Figure 3E: One-way ANOVA: Square Root-Transformed Cortical Porosity = Genotype : Means, SD, n, paired differences and p-values**

For Square Root-Transformed Cortical Porosity in Figure 3E, by the Tukey p-values, Tnfrsf11b<sup>+/+</sup> has significantly lower values on average than Tnfrsf11b<sup>-/-</sup> (p<0.0001). Tnfrsf11b<sup>-/-</sup> has significantly higher values on average than Tnfrsf11b<sup>f/f</sup> (p<0.0001) & SOST-Cre;Tnfrsf11b<sup>f/f</sup> (p<0.0001).

The (1-2)-(3-4) difference of differences contrast is also statistically significant (p<0.0001).

| Type     | Test/Level of geno                  | n | Mean  | Std Dev | 2nd level of geno                   | Difference of means | p-value | Tukey p-value | Adjusted DSCF p-value (nonparam.) |
|----------|-------------------------------------|---|-------|---------|-------------------------------------|---------------------|---------|---------------|-----------------------------------|
| Test     | S-W Normality, observed             | . | .     | .       |                                     | .                   | 0.0001* | .             | .                                 |
| Test     | S-W Normality, residuals            | . | .     | .       |                                     | .                   | 0.0779  | .             | .                                 |
| Test     | Equal variance test                 | . | .     | .       |                                     | .                   | 0.1194  | .             | .                                 |
| Mean     | 1)Tnfrsf11b <sup>+/+</sup>          | 6 | 0.47  | 0.44    |                                     | .                   | .       | .             | .                                 |
| Mean     | 2)Tnfrsf11b <sup>-/-</sup>          | 7 | 4.14  | 0.72    |                                     | .                   | .       | .             | .                                 |
| Mean     | 3)Tnfrsf11b <sup>f/f</sup>          | 6 | 0.28  | 0.25    |                                     | .                   | .       | .             | .                                 |
| Mean     | 4)Sost-Cre;Tnfrsf11b <sup>f/f</sup> | 6 | 0.25  | 0.12    |                                     | .                   | .       | .             | .                                 |
| Diff     | 1)Tnfrsf11b <sup>+/+</sup>          | . | .     | .       | 2)Tnfrsf11b <sup>-/-</sup>          | -3.66               | <.0001* | <.0001*       | 0.0287*                           |
| Diff     | 1)Tnfrsf11b <sup>+/+</sup>          | . | .     | .       | 3)Tnfrsf11b <sup>f/f</sup>          | 0.20                | 0.4624  | 0.8762        | 0.9886                            |
| Diff     | 1)Tnfrsf11b <sup>+/+</sup>          | . | .     | .       | 4)Sost-Cre;Tnfrsf11b <sup>f/f</sup> | 0.22                | 0.4110  | 0.8354        | 0.9886                            |
| Diff     | 2)Tnfrsf11b <sup>-/-</sup>          | . | .     | .       | 3)Tnfrsf11b <sup>f/f</sup>          | 3.86                | <.0001* | <.0001*       | 0.0287*                           |
| Diff     | 2)Tnfrsf11b <sup>-/-</sup>          | . | .     | .       | 4)Sost-Cre;Tnfrsf11b <sup>f/f</sup> | 3.89                | <.0001* | <.0001*       | 0.0287*                           |
| Diff     | 3)Tnfrsf11b <sup>f/f</sup>          | . | .     | .       | 4)Sost-Cre;Tnfrsf11b <sup>f/f</sup> | 0.02                | 0.9289  | 0.9997        | 0.9886                            |
| Contrast | (1-2)-(3-4)                         | . | -3.69 | 0.37    |                                     | .                   | <.0001* | .             | .                                 |

**Figure 3F, panel 1: One-way ANOVA: Rank-transformed *Tnfrsf11b* Gene Expression = Genotype : Means, SD, n, paired differences and p-values**

For Rank-transformed *Tnfrsf11b* gene expression in Figure 3F, panel 1, by the Tukey p-values, *Tnfrsf11b*<sup>+/+</sup> has significantly higher values on average than *Tnfrsf11b*<sup>-/-</sup> (p<0.0001) and *SOST-Cre;Tnfrsf11b*<sup>f/f</sup> (p=0.0029). *Tnfrsf11b*<sup>-/-</sup> has significantly lower values on average than *Tnfrsf11b*<sup>f/f</sup> (p<0.0001) & *SOST-Cre;Tnfrsf11b*<sup>f/f</sup> (p=0.0058).

The (1-2)-(3-4) difference of differences contrast is also statistically significant (p=0.044).

| Type     | Test/Level of geno                          | n | Mean  | Std Dev | 2nd level of geno                           | Difference of means | p-value | Tukey p-value | Adjusted DSCF p-value (nonparam.) |
|----------|---------------------------------------------|---|-------|---------|---------------------------------------------|---------------------|---------|---------------|-----------------------------------|
| Test     | S-W Normality, observed                     | . | .     | .       |                                             | .                   | 0.2354  | .             | .                                 |
| Test     | S-W Normality, residuals                    | . | .     | .       |                                             | .                   | 0.2037  | .             | .                                 |
| Test     | Equal variance test                         | . | .     | .       |                                             | .                   | 0.4363  | .             | .                                 |
| Mean     | 1) <i>Tnfrsf11b</i> <sup>+/+</sup>          | 6 | 20.67 | 5.89    |                                             | .                   | .       | .             | .                                 |
| Mean     | 2) <i>Tnfrsf11b</i> <sup>-/-</sup>          | 6 | 3.50  | 1.76    |                                             | .                   | .       | .             | .                                 |
| Mean     | 3) <i>Tnfrsf11b</i> <sup>f/f</sup>          | 6 | 18.67 | 4.27    |                                             | .                   | .       | .             | .                                 |
| Mean     | 4) <i>Sost-Cre;Tnfrsf11b</i> <sup>f/f</sup> | 8 | 11.75 | 3.54    |                                             | .                   | .       | .             | .                                 |
| Diff     | 1) <i>Tnfrsf11b</i> <sup>+/+</sup>          | . | .     | .       | 2) <i>Tnfrsf11b</i> <sup>-/-</sup>          | 17.17               | <.0001* | <.0001*       | 0.0388*                           |
| Diff     | 1) <i>Tnfrsf11b</i> <sup>+/+</sup>          | . | .     | .       | 3) <i>Tnfrsf11b</i> <sup>f/f</sup>          | 2.00                | 0.4059  | 0.8313        | 0.6766                            |
| Diff     | 1) <i>Tnfrsf11b</i> <sup>+/+</sup>          | . | .     | .       | 4) <i>Sost-Cre;Tnfrsf11b</i> <sup>f/f</sup> | 8.92                | 0.0005* | 0.0029*       | 0.1112                            |
| Diff     | 2) <i>Tnfrsf11b</i> <sup>-/-</sup>          | . | .     | .       | 3) <i>Tnfrsf11b</i> <sup>f/f</sup>          | -15.17              | <.0001* | <.0001*       | 0.0388*                           |
| Diff     | 2) <i>Tnfrsf11b</i> <sup>-/-</sup>          | . | .     | .       | 4) <i>Sost-Cre;Tnfrsf11b</i> <sup>f/f</sup> | -8.25               | 0.0011* | 0.0058*       | 0.0388*                           |
| Diff     | 3) <i>Tnfrsf11b</i> <sup>f/f</sup>          | . | .     | .       | 4) <i>Sost-Cre;Tnfrsf11b</i> <sup>f/f</sup> | 6.92                | 0.0048* | 0.0232*       | 0.0725                            |
| Contrast | (1-2)-(3-4)                                 | . | 10.25 | 3.23    |                                             | .                   | 0.0044* | .             | .                                 |

**Figure 3F, panel 2: One-way ANOVA: *Tnfsf11* Gene Expression = Genotype : Means, SD, n, paired differences and p-values**

For *Tnfsf11* gene expression in Figure 3F, panel 2, there are no statistically significant pairwise comparisons.

The (1-2)-(3-4) difference of differences contrast is not statistically significant (p=0.5579).

| Type     | Test/Level of geno                 | n | Mean | Std Dev | 2nd level of geno                  | Difference of means | p-value | Tukey p-value | Adjusted DSCF p-value (nonparam.) |
|----------|------------------------------------|---|------|---------|------------------------------------|---------------------|---------|---------------|-----------------------------------|
| Test     | S-W Normality, observed            | . | .    | .       |                                    | .                   | 0.7549  | .             | .                                 |
| Test     | S-W Normality, residuals           | . | .    | .       |                                    | .                   | 0.7996  | .             | .                                 |
| Test     | Equal variance test                | . | .    | .       |                                    | .                   | 0.1950  | .             | .                                 |
| Mean     | 1)Tnfrsf11b <sup>+/+</sup>         | 6 | 1.37 | 0.49    |                                    | .                   | .       | .             | .                                 |
| Mean     | 2)Tnfrsf11b <sup>-/-</sup>         | 6 | 1.04 | 0.26    |                                    | .                   | .       | .             | .                                 |
| Mean     | 3)Tnfrsf11b <sup>ff</sup>          | 6 | 1.23 | 0.27    |                                    | .                   | .       | .             | .                                 |
| Mean     | 4)Sost-Cre;Tnfrsf11b <sup>ff</sup> | 8 | 1.06 | 0.25    |                                    | .                   | .       | .             | .                                 |
| Diff     | 1)Tnfrsf11b <sup>+/+</sup>         | . | .    | .       | 2)Tnfrsf11b <sup>-/-</sup>         | 0.33                | 0.0965  | 0.3298        | 0.9940                            |
| Diff     | 1)Tnfrsf11b <sup>+/+</sup>         | . | .    | .       | 3)Tnfrsf11b <sup>ff</sup>          | 0.13                | 0.4808  | 0.8892        | 0.9940                            |
| Diff     | 1)Tnfrsf11b <sup>+/+</sup>         | . | .    | .       | 4)Sost-Cre;Tnfrsf11b <sup>ff</sup> | 0.31                | 0.0938  | 0.3223        | 0.9940                            |
| Diff     | 2)Tnfrsf11b <sup>-/-</sup>         | . | .    | .       | 3)Tnfrsf11b <sup>ff</sup>          | -0.19               | 0.3193  | 0.7403        | 0.9940                            |
| Diff     | 2)Tnfrsf11b <sup>-/-</sup>         | . | .    | .       | 4)Sost-Cre;Tnfrsf11b <sup>ff</sup> | -0.02               | 0.9179  | 0.9996        | 0.9940                            |
| Diff     | 3)Tnfrsf11b <sup>ff</sup>          | . | .    | .       | 4)Sost-Cre;Tnfrsf11b <sup>ff</sup> | 0.17                | 0.3354  | 0.7594        | 0.9940                            |
| Contrast | (1-2)-(3-4)                        | . | 0.15 | 0.26    |                                    | .                   | 0.5579  | .             | .                                 |

**Figure 3F, panel 3: One-way ANOVA: TRAP Gene Expression = Genotype : Means, SD, n, paired differences and p-values**

For *TRAP* gene expression in Figure 3F, panel 3, by the Tukey p-values, *Tnfrsf11b*<sup>+/+</sup> has significantly lower values on average than *Tnfrsf11b*<sup>-/-</sup> (p<0.0001). *Tnfrsf11b*<sup>-/-</sup> has significantly higher values on average than *Tnfrsf11b*<sup>f/f</sup> (p<0.0001) & *SOST-Cre;Tnfrsf11b*<sup>f/f</sup> (p<0.0001).

The (1-2)-(3-4) difference of differences contrast is also statistically significant (p<0.0001).

| Type     | Test/Level of geno                          | n | Mean    | Std Dev | 2nd level of geno                           | Difference of means | p-value | Tukey p-value | Adjusted DSCF p-value (nonparam.) |
|----------|---------------------------------------------|---|---------|---------|---------------------------------------------|---------------------|---------|---------------|-----------------------------------|
| Test     | S-W Normality, observed                     | . | .       | .       |                                             | .                   | 0.0001* | .             | .                                 |
| Test     | S-W Normality, residuals                    | . | .       | .       |                                             | .                   | 0.6406  | .             | .                                 |
| Test     | Equal variance test                         | . | .       | .       |                                             | .                   | 0.5028  | .             | .                                 |
| Mean     | 1) <i>Tnfrsf11b</i> <sup>+/+</sup>          | 6 | 129.67  | 23.39   |                                             | .                   | .       | .             | .                                 |
| Mean     | 2) <i>Tnfrsf11b</i> <sup>-/-</sup>          | 6 | 326.76  | 31.64   |                                             | .                   | .       | .             | .                                 |
| Mean     | 3) <i>Tnfrsf11b</i> <sup>f/f</sup>          | 6 | 102.47  | 18.28   |                                             | .                   | .       | .             | .                                 |
| Mean     | 4) <i>Sost-Cre;Tnfrsf11b</i> <sup>f/f</sup> | 8 | 121.23  | 22.63   |                                             | .                   | .       | .             | .                                 |
| Diff     | 1) <i>Tnfrsf11b</i> <sup>+/+</sup>          | . | .       | .       | 2) <i>Tnfrsf11b</i> <sup>-/-</sup>          | -197.09             | <.0001* | <.0001*       | 0.0412*                           |
| Diff     | 1) <i>Tnfrsf11b</i> <sup>+/+</sup>          | . | .       | .       | 3) <i>Tnfrsf11b</i> <sup>f/f</sup>          | 27.20               | 0.0656  | 0.2417        | 0.2386                            |
| Diff     | 1) <i>Tnfrsf11b</i> <sup>+/+</sup>          | . | .       | .       | 4) <i>Sost-Cre;Tnfrsf11b</i> <sup>f/f</sup> | 8.44                | 0.5270  | 0.9169        | 0.8660                            |
| Diff     | 2) <i>Tnfrsf11b</i> <sup>-/-</sup>          | . | .       | .       | 3) <i>Tnfrsf11b</i> <sup>f/f</sup>          | 224.29              | <.0001* | <.0001*       | 0.0412*                           |
| Diff     | 2) <i>Tnfrsf11b</i> <sup>-/-</sup>          | . | .       | .       | 4) <i>Sost-Cre;Tnfrsf11b</i> <sup>f/f</sup> | 205.53              | <.0001* | <.0001*       | 0.0412*                           |
| Diff     | 3) <i>Tnfrsf11b</i> <sup>f/f</sup>          | . | .       | .       | 4) <i>Sost-Cre;Tnfrsf11b</i> <sup>f/f</sup> | -18.76              | 0.1670  | 0.4954        | 0.4022                            |
| Contrast | (1-2)-(3-4)                                 | . | -178.33 | 19.22   |                                             | .                   | <.0001* | .             | .                                 |

**Figure 3F, panel 4: One-way ANOVA: CTSK Gene Expression = Genotype : Means, SD, n, paired differences and p-values**

For *CTSK* gene expression in Figure 3F, panel 4, by the Tukey p-values, *Tnfrsf11b*<sup>+/+</sup> has significantly lower values on average than *Tnfrsf11b*<sup>-/-</sup> (p<0.0001). *Tnfrsf11b*<sup>-/-</sup> has significantly higher values on average than *Tnfrsf11b*<sup>f/f</sup> (p<0.0001) & *SOST-Cre;Tnfrsf11b*<sup>f/f</sup> (p<0.0001).

The (1-2)-(3-4) difference of differences contrast is also statistically significant (p<0.0001).

| Type     | Test/Level of geno                          | n | Mean    | Std Dev | 2nd level of geno                           | Difference of means | p-value | Tukey p-value | Adjusted DSCF p-value (nonparam.) |
|----------|---------------------------------------------|---|---------|---------|---------------------------------------------|---------------------|---------|---------------|-----------------------------------|
| Test     | S-W Normality, observed                     | . | .       | .       |                                             | .                   | 0.0001* | .             | .                                 |
| Test     | S-W Normality, residuals                    | . | .       | .       |                                             | .                   | 0.7345  | .             | .                                 |
| Test     | Equal variance test                         | . | .       | .       |                                             | .                   | 0.0584  | .             | .                                 |
| Mean     | 1) <i>Tnfrsf11b</i> <sup>+/+</sup>          | 6 | 122.88  | 30.31   |                                             | .                   | .       | .             | .                                 |
| Mean     | 2) <i>Tnfrsf11b</i> <sup>-/-</sup>          | 6 | 335.79  | 38.85   |                                             | .                   | .       | .             | .                                 |
| Mean     | 3) <i>Tnfrsf11b</i> <sup>f/f</sup>          | 6 | 101.03  | 13.58   |                                             | .                   | .       | .             | .                                 |
| Mean     | 4) <i>Sost-Cre;Tnfrsf11b</i> <sup>f/f</sup> | 8 | 126.14  | 22.48   |                                             | .                   | .       | .             | .                                 |
| Diff     | 1) <i>Tnfrsf11b</i> <sup>+/+</sup>          | . | .       | .       | 2) <i>Tnfrsf11b</i> <sup>-/-</sup>          | -212.91             | <.0001* | <.0001*       | 0.0412*                           |
| Diff     | 1) <i>Tnfrsf11b</i> <sup>+/+</sup>          | . | .       | .       | 3) <i>Tnfrsf11b</i> <sup>f/f</sup>          | 21.85               | 0.1822  | 0.5259        | 0.8119                            |
| Diff     | 1) <i>Tnfrsf11b</i> <sup>+/+</sup>          | . | .       | .       | 4) <i>Sost-Cre;Tnfrsf11b</i> <sup>f/f</sup> | -3.26               | 0.8282  | 0.9961        | 0.9803                            |
| Diff     | 2) <i>Tnfrsf11b</i> <sup>-/-</sup>          | . | .       | .       | 3) <i>Tnfrsf11b</i> <sup>f/f</sup>          | 234.76              | <.0001* | <.0001*       | 0.0412*                           |
| Diff     | 2) <i>Tnfrsf11b</i> <sup>-/-</sup>          | . | .       | .       | 4) <i>Sost-Cre;Tnfrsf11b</i> <sup>f/f</sup> | 209.66              | <.0001* | <.0001*       | 0.0412*                           |
| Diff     | 3) <i>Tnfrsf11b</i> <sup>f/f</sup>          | . | .       | .       | 4) <i>Sost-Cre;Tnfrsf11b</i> <sup>f/f</sup> | -25.11              | 0.1047  | 0.3513        | 0.3191                            |
| Contrast | (1-2)-(3-4)                                 | . | -187.81 | 21.72   |                                             | .                   | <.0001* | .             | .                                 |



**Figure 4A, left panel: One-way ANOVA: Femur Cortical Thickness = Genotype : Means, SD, n, paired differences and p-values**

For all results in Figure 4, a One-Way ANOVA model was fitted to the 4 genotypes. Normality and Equal Variance assumptions of the residuals were tested and appropriate transformations used where needed. Three Pairwise comparisons and Three 'Difference of Differences' contrasts was also estimated with each group of 3 being adjusted by the False Discovery Rate Procedure.

For femur cortical thickness in Figure 4A, left panel, by the FDR adjusted p-values, *Tnfrsf11b*<sup>+/+</sup> has significantly higher values on average than *Tnfrsf11b*<sup>-/-</sup> (p<0.0001). *Tnfrsf11b*<sup>ε/ε</sup> (*Dmp1*) has significantly higher values on average than *Dmp1-Cre;Tnfrsf11b*<sup>ε/ε</sup> (p=0.0366). *Tnfrsf11b*<sup>ε/ε</sup> (*Sost*) has significantly higher values on average than *Sost-Cre;Tnfrsf11b*<sup>ε/ε</sup> (p=0.0103).

The (1-2)-(3-4) and (1-2)-(5-6) difference of differences contrasts are also statistically significant (p=0.0046, 0.0085, adjusted p-values respectively).

| <i>Dep. Var.</i>  | <i>Type</i> | <i>Test/Level of geno</i>                          | <i>n</i> | <i>Mean</i> | <i>Std Dev</i> | <i>2nd level of geno</i>                    | <i>Difference of means</i> | <i>p-value</i> | <i>Adjusted p-value</i> |
|-------------------|-------------|----------------------------------------------------|----------|-------------|----------------|---------------------------------------------|----------------------------|----------------|-------------------------|
| <i>femur_ctth</i> | Test        | S-W Normality, obser                               | .        | .           | .              |                                             | . 0.1355                   | .              | .                       |
|                   | Test        | S-W Normality, resid                               | .        | .           | .              |                                             | . 0.7669                   | .              | .                       |
|                   | Test        | Equal variance test                                | .        | .           | .              |                                             | . 0.8227                   | .              | .                       |
|                   | Mean        | 1) <i>Tnfrsf11b</i> <sup>+/+</sup>                 | 6        | 0.22        | 0.01           |                                             | . .                        | .              | .                       |
|                   | Mean        | 2) <i>Tnfrsf11b</i> <sup>-/-</sup>                 | 6        | 0.16        | 0.02           |                                             | . .                        | .              | .                       |
|                   | Mean        | 3) <i>Tnfrsf11b</i> <sup>ε/ε</sup> ( <i>Dmp1</i> ) | 6        | 0.21        | 0.01           |                                             | . .                        | .              | .                       |
|                   | Mean        | 4) <i>Dmp1-Cre;Tnfrsf11b</i> <sup>ε/ε</sup>        | 6        | 0.20        | 0.01           |                                             | . .                        | .              | .                       |
|                   | Mean        | 5) <i>Tnfrsf11b</i> <sup>ε/ε</sup> ( <i>Sost</i> ) | 6        | 0.21        | 0.01           |                                             | . .                        | .              | .                       |
|                   | Mean        | 6) <i>Sost-Cre;Tnfrsf11b</i> <sup>ε/ε</sup>        | 6        | 0.19        | 0.01           |                                             | . .                        | .              | .                       |
|                   | Diff        | 1) <i>Tnfrsf11b</i> <sup>+/+</sup>                 | .        | .           | .              | 2) <i>Tnfrsf11b</i> <sup>-/-</sup>          | 0.05                       | <.0001*        | <.0001*                 |
|                   | Diff        | 3) <i>Tnfrsf11b</i> <sup>ε/ε</sup> ( <i>Dmp1</i> ) | .        | .           | .              | 4) <i>Dmp1-Cre;Tnfrsf11b</i> <sup>ε/ε</sup> | 0.02                       | 0.0366*        | 0.0366*                 |
|                   | Diff        | 5) <i>Tnfrsf11b</i> <sup>ε/ε</sup> ( <i>Sost</i> ) | .        | .           | .              | 6) <i>Sost-Cre;Tnfrsf11b</i> <sup>ε/ε</sup> | 0.02                       | 0.0069*        | 0.0103*                 |
|                   | Contrast    | (1-2)-(3-4)                                        | .        | 0.04        | 0.01           |                                             | . 0.0015*                  | 0.0046*        |                         |
|                   | Contrast    | (1-2)-(5-6)                                        | .        | 0.03        | 0.01           |                                             | . 0.0057*                  | 0.0085*        |                         |
|                   | Contrast    | (3-4)-(5-6)                                        | .        | -0.01       | 0.01           |                                             | . 0.6174                   | 0.6174         |                         |

**Figure 4A, right panel: One-way ANOVA: L4 Cortical Thickness = Genotype : Means, SD, n, paired differences and p-values**

For L4 cortical thickness in Figure 4A, right panel, by the FDR adjusted p-values, *Tnfrsf11b*<sup>+/+</sup> has significantly higher values on average than *Tnfrsf11b*<sup>-/-</sup> (p<0.0001). *Tnfrsf11b*<sup>f/f</sup> (*Dmp1*) has significantly higher values on average than *Dmp1-Cre;Tnfrsf11b*<sup>f/f</sup> (p<0.0001). *Tnfrsf11b*<sup>f/f</sup> (*Sost*) has significantly higher values on average than *Sost-Cre;Tnfrsf11b*<sup>f/f</sup> (p=0.0025).

The (1-2)-(5-6) and (3-4)-(5-6) difference of differences contrasts are also statistically significant (p<0.0001, p=0.0001, adjusted p-values respectively).

| <i>Dep. Var.</i>  | <i>Type</i> | <i>Test/Level of geno</i>                          | <i>n</i> | <i>Mean</i> | <i>Std Dev</i> | <i>2nd level of geno</i>                    | <i>Difference of means</i> | <i>p-value</i> | <i>Adjusted p-value</i> |
|-------------------|-------------|----------------------------------------------------|----------|-------------|----------------|---------------------------------------------|----------------------------|----------------|-------------------------|
| <i>spine_ctth</i> | Test        | S-W Normality, obser                               | .        | .           | .              |                                             | .                          | 0.0132*        | .                       |
|                   | Test        | S-W Normality, resid                               | .        | .           | .              |                                             | .                          | 0.7250         | .                       |
|                   | Test        | Equal variance test                                | .        | .           | .              |                                             | .                          | 0.2705         | .                       |
|                   | Mean        | 1) <i>Tnfrsf11b</i> <sup>+/+</sup>                 | 6        | 0.09        | 0.01           |                                             | .                          | .              | .                       |
|                   | Mean        | 2) <i>Tnfrsf11b</i> <sup>-/-</sup>                 | 6        | 0.06        | 0.01           |                                             | .                          | .              | .                       |
|                   | Mean        | 3) <i>Tnfrsf11b</i> <sup>f/f</sup> ( <i>Dmp1</i> ) | 6        | 0.09        | 0.01           |                                             | .                          | .              | .                       |
|                   | Mean        | 4) <i>Dmp1-Cre;Tnfrsf11b</i> <sup>f/f</sup>        | 6        | 0.06        | 0.01           |                                             | .                          | .              | .                       |
|                   | Mean        | 5) <i>Tnfrsf11b</i> <sup>f/f</sup> ( <i>Sost</i> ) | 6        | 0.09        | 0.00           |                                             | .                          | .              | .                       |
|                   | Mean        | 6) <i>Sost-Cre;Tnfrsf11b</i> <sup>f/f</sup>        | 6        | 0.08        | 0.00           |                                             | .                          | .              | .                       |
|                   | Diff        | 1) <i>Tnfrsf11b</i> <sup>+/+</sup>                 | .        | .           | .              | 2) <i>Tnfrsf11b</i> <sup>-/-</sup>          | 0.04                       | <.0001*        | <.0001*                 |
|                   | Diff        | 3) <i>Tnfrsf11b</i> <sup>f/f</sup> ( <i>Dmp1</i> ) | .        | .           | .              | 4) <i>Dmp1-Cre;Tnfrsf11b</i> <sup>f/f</sup> | 0.03                       | <.0001*        | <.0001*                 |
|                   | Diff        | 5) <i>Tnfrsf11b</i> <sup>f/f</sup> ( <i>Sost</i> ) | .        | .           | .              | 6) <i>Sost-Cre;Tnfrsf11b</i> <sup>f/f</sup> | 0.01                       | 0.0025*        | 0.0025*                 |
|                   | Contrast    | (1-2)-(3-4)                                        | .        | 0.00        | 0.00           |                                             | .                          | 0.7557         | 0.7557                  |
|                   | Contrast    | (1-2)-(5-6)                                        | .        | 0.03        | 0.00           |                                             | .                          | <.0001*        | <.0001*                 |
|                   | Contrast    | (3-4)-(5-6)                                        | .        | 0.02        | 0.00           |                                             | .                          | <.0001*        | <.0001*                 |

**Figure 4B, left panel: One-way ANOVA: Rank transformed Femur Cancellous BV/TV = Genotype : Means, SD, n, paired differences and p-values**

For Rank transformed femur cancellous BV/TV in Figure 4B, left panel, by the FDR adjusted p-values, *Tnfrsf11b*<sup>+/+</sup> has significantly higher values on average than *Tnfrsf11b*<sup>-/-</sup> (p<0.0001). *Tnfrsf11b*<sup>f/f</sup> (*Dmp1*) has significantly higher values on average than *Dmp1-Cre;Tnfrsf11b*<sup>f/f</sup> (p<0.0001).

The (1-2)-(5-6) and (3-4)-(5-6) difference of differences contrasts are also statistically significant (p=0.0179, 0.0179, adjusted p-values respectively).

| <i>Dep. Var.</i>    | <i>Type</i> | <i>Test/Level of geno</i>                          | <i>n</i> | <i>Mean</i> | <i>Std Dev</i> | <i>2nd level of geno</i>                    | <i>Difference of means</i> | <i>p-value</i> | <i>Adjusted p-value</i> |
|---------------------|-------------|----------------------------------------------------|----------|-------------|----------------|---------------------------------------------|----------------------------|----------------|-------------------------|
| <i>r_femur_bvtv</i> | Test        | S-W Normality, obser                               | .        | .           | .              |                                             | . 0.1578                   | .              |                         |
|                     | Test        | S-W Normality, resid                               | .        | .           | .              |                                             | . 0.1428                   | .              |                         |
|                     | Test        | Equal variance test                                | .        | .           | .              |                                             | . 0.0345*                  | .              |                         |
|                     | Mean        | 1) <i>Tnfrsf11b</i> <sup>+/+</sup>                 | 6        | 23.33       | 6.89           |                                             | . .                        | .              |                         |
|                     | Mean        | 2) <i>Tnfrsf11b</i> <sup>-/-</sup>                 | 6        | 4.17        | 2.86           |                                             | . .                        | .              |                         |
|                     | Mean        | 3) <i>Tnfrsf11b</i> <sup>f/f</sup> ( <i>Dmp1</i> ) | 6        | 27.17       | 6.55           |                                             | . .                        | .              |                         |
|                     | Mean        | 4) <i>Dmp1-Cre;Tnfrsf11b</i> <sup>f/f</sup>        | 6        | 8.83        | 2.64           |                                             | . .                        | .              |                         |
|                     | Mean        | 5) <i>Tnfrsf11b</i> <sup>f/f</sup> ( <i>Sost</i> ) | 6        | 26.33       | 6.35           |                                             | . .                        | .              |                         |
|                     | Mean        | 6) <i>Sost-Cre;Tnfrsf11b</i> <sup>f/f</sup>        | 6        | 21.17       | 8.47           |                                             | . .                        | .              |                         |
|                     | Diff        | 1) <i>Tnfrsf11b</i> <sup>+/+</sup>                 | .        | .           | .              | 2) <i>Tnfrsf11b</i> <sup>-/-</sup>          | 19.17                      | <.0001*        | <.0001*                 |
|                     | Diff        | 3) <i>Tnfrsf11b</i> <sup>f/f</sup> ( <i>Dmp1</i> ) | .        | .           | .              | 4) <i>Dmp1-Cre;Tnfrsf11b</i> <sup>f/f</sup> | 18.33                      | <.0001*        | <.0001*                 |
|                     | Diff        | 5) <i>Tnfrsf11b</i> <sup>f/f</sup> ( <i>Sost</i> ) | .        | .           | .              | 6) <i>Sost-Cre;Tnfrsf11b</i> <sup>f/f</sup> | 5.17                       | 0.1477         | 0.1477                  |
|                     | Contrast    | (1-2)-(3-4)                                        | .        | 0.83        | 4.92           |                                             | . 0.8666                   | 0.8666         |                         |
|                     | Contrast    | (1-2)-(5-6)                                        | .        | 14.00       | 4.92           |                                             | . 0.0079*                  | 0.0179*        |                         |
| Contrast            | (3-4)-(5-6) | .                                                  | 13.17    | 4.92        |                | . 0.0119*                                   | 0.0179*                    |                |                         |

**Figure 4B, right panel: One-way ANOVA: Square Root transformed L4 Cancellous BV/TV = Genotype : Means, SD, n, paired differences and p-values**

For Square Root transformed L4 cancellous BV/TV in Figure 4B, right panel, by the FDR adjusted p-values, *Tnfrsf11b*<sup>+/+</sup> has significantly higher values on average than *Tnfrsf11b*<sup>-/-</sup> (p<0.0001). *Tnfrsf11b*<sup>f/f</sup> (Dmp1) has significantly higher values on average than *Dmp1-Cre;Tnfrsf11b*<sup>f/f</sup> (p<0.0001). *Tnfrsf11b*<sup>f/f</sup> (Sost) has significantly higher values on average than *Sost-Cre;Tnfrsf11b*<sup>f/f</sup> (p=0.0447).

The (1-2)-(3-4), (1-2)-(5-6), (3-4)-(5-6) difference of differences contrasts are also statistically significant (p=0.0460, <0.0001, <0.0001, adjusted p-values respectively).

| <i>Dep. Var.</i>      | <i>Type</i> | <i>Test/Level of geno</i>                   | <i>n</i> | <i>Mean</i> | <i>Std Dev</i> | <i>2nd level of geno</i>                    | <i>Difference of means</i> | <i>p-value</i> | <i>Adjusted p-value</i> |
|-----------------------|-------------|---------------------------------------------|----------|-------------|----------------|---------------------------------------------|----------------------------|----------------|-------------------------|
| <i>sqr_spine_bvtv</i> | Test        | S-W Normality, obser                        | .        | .           | .              |                                             | .                          | 0.0002*        | .                       |
|                       | Test        | S-W Normality, resid                        | .        | .           | .              |                                             | .                          | 0.4572         | .                       |
|                       | Test        | Equal variance test                         | .        | .           | .              |                                             | .                          | 0.5197         | .                       |
|                       | Mean        | 1) <i>Tnfrsf11b</i> <sup>+/+</sup>          | 6        | 0.42        | 0.02           |                                             | .                          | .              | .                       |
|                       | Mean        | 2) <i>Tnfrsf11b</i> <sup>-/-</sup>          | 6        | 0.12        | 0.02           |                                             | .                          | .              | .                       |
|                       | Mean        | 3) <i>Tnfrsf11b</i> <sup>f/f</sup> (Dmp1)   | 6        | 0.48        | 0.04           |                                             | .                          | .              | .                       |
|                       | Mean        | 4) <i>Dmp1-Cre;Tnfrsf11b</i> <sup>f/f</sup> | 6        | 0.23        | 0.02           |                                             | .                          | .              | .                       |
|                       | Mean        | 5) <i>Tnfrsf11b</i> <sup>f/f</sup> (Sost)   | 6        | 0.44        | 0.02           |                                             | .                          | .              | .                       |
|                       | Mean        | 6) <i>Sost-Cre;Tnfrsf11b</i> <sup>f/f</sup> | 6        | 0.41        | 0.03           |                                             | .                          | .              | .                       |
|                       | Diff        | 1) <i>Tnfrsf11b</i> <sup>+/+</sup>          | .        | .           | .              | 2) <i>Tnfrsf11b</i> <sup>-/-</sup>          | 0.30                       | <.0001*        | <.0001*                 |
|                       | Diff        | 3) <i>Tnfrsf11b</i> <sup>f/f</sup> (Dmp1)   | .        | .           | .              | 4) <i>Dmp1-Cre;Tnfrsf11b</i> <sup>f/f</sup> | 0.25                       | <.0001*        | <.0001*                 |
|                       | Diff        | 5) <i>Tnfrsf11b</i> <sup>f/f</sup> (Sost)   | .        | .           | .              | 6) <i>Sost-Cre;Tnfrsf11b</i> <sup>f/f</sup> | 0.03                       | 0.0447*        | 0.0447*                 |
|                       | Contrast    | (1-2)-(3-4)                                 | .        | 0.05        | 0.02           |                                             | .                          | 0.0460*        | 0.0460*                 |
|                       | Contrast    | (1-2)-(5-6)                                 | .        | 0.27        | 0.02           |                                             | .                          | <.0001*        | <.0001*                 |
|                       | Contrast    | (3-4)-(5-6)                                 | .        | 0.22        | 0.02           |                                             | .                          | <.0001*        | <.0001*                 |

**Figure 4E: One-way ANOVA: Rank transformed Cortical Porosity = Genotype : Means, SD, n, paired differences and p-values**

For Rank transformed cortical porosity in Figure 4E, by the FDR adjusted p-values, *Tnfrsf11b*<sup>+/+</sup> has significantly lower values on average than *Tnfrsf11b*<sup>-/-</sup> (p<0.0001). *Tnfrsf11b*<sup>ε/ε</sup> (*Dmp1*) has significantly lower values on average than *Dmp1-Cre;Tnfrsf11b*<sup>ε/ε</sup> (p<0.0001). *Tnfrsf11b*<sup>ε/ε</sup> (*Sost*) has significantly lower values on average than *Sost-Cre;Tnfrsf11b*<sup>ε/ε</sup> (p=0.0018).

The (1-2)-(5-6) difference of differences contrast is also statistically significant (p=0.0009).

| <i>Dep. Var.</i>          | <i>Type</i> | <i>Test/Level of geno</i>                         | <i>n</i> | <i>Mean</i> | <i>Std Dev</i> | <i>2nd level of geno</i>                   | <i>Difference of means</i> | <i>p-value</i> | <i>Adjusted p-value</i> |
|---------------------------|-------------|---------------------------------------------------|----------|-------------|----------------|--------------------------------------------|----------------------------|----------------|-------------------------|
| <i>r_porosity_percent</i> | Test        | S-W Normality, obser                              | .        | .           | .              |                                            | .                          | 0.0001*        | .                       |
|                           | Test        | S-W Normality, resid                              | .        | .           | .              |                                            | .                          | 0.0333*        | .                       |
|                           | Test        | Equal variance test                               | .        | .           | .              |                                            | .                          | 0.4908         | .                       |
|                           | Mean        | 1) <i>Tnfrsf11b</i> <sup>+/+</sup>                | 6        | 9.33        | 3.27           |                                            | .                          | .              | .                       |
|                           | Mean        | 2) <i>Tnfrsf11b</i> <sup>-/-</sup>                | 6        | 33.00       | 2.83           |                                            | .                          | .              | .                       |
|                           | Mean        | 3) <i>Tnfrsf11b</i> <sup>ff</sup> ( <i>Dmp1</i> ) | 6        | 11.83       | 6.15           |                                            | .                          | .              | .                       |
|                           | Mean        | 4) <i>Dmp1-Cre;Tnfrsf11b</i> <sup>ff</sup>        | 6        | 28.00       | 2.37           |                                            | .                          | .              | .                       |
|                           | Mean        | 5) <i>Tnfrsf11b</i> <sup>ff</sup> ( <i>Sost</i> ) | 6        | 10.00       | 4.90           |                                            | .                          | .              | .                       |
|                           | Mean        | 6) <i>Sost-Cre;Tnfrsf11b</i> <sup>ff</sup>        | 6        | 18.83       | 5.78           |                                            | .                          | .              | .                       |
|                           | Diff        | 1) <i>Tnfrsf11b</i> <sup>+/+</sup>                | .        | .           | .              | 2) <i>Tnfrsf11b</i> <sup>-/-</sup>         | -23.67                     | <.0001*        | <.0001*                 |
|                           | Diff        | 3) <i>Tnfrsf11b</i> <sup>ff</sup> ( <i>Dmp1</i> ) | .        | .           | .              | 4) <i>Dmp1-Cre;Tnfrsf11b</i> <sup>ff</sup> | -16.17                     | <.0001*        | <.0001*                 |
|                           | Diff        | 5) <i>Tnfrsf11b</i> <sup>ff</sup> ( <i>Sost</i> ) | .        | .           | .              | 6) <i>Sost-Cre;Tnfrsf11b</i> <sup>ff</sup> | -8.83                      | 0.0018*        | 0.0018*                 |
|                           | Contrast    | (1-2)-(3-4)                                       | .        | -7.50       | 3.64           |                                            | .                          | 0.0483*        | 0.0531                  |
|                           | Contrast    | (1-2)-(5-6)                                       | .        | -14.83      | 3.64           |                                            | .                          | 0.0003*        | 0.0009*                 |
|                           | Contrast    | (3-4)-(5-6)                                       | .        | -7.33       | 3.64           |                                            | .                          | 0.0531         | 0.0531                  |

**Figure 4F, left panel: One-way ANOVA: Serum OPG= Genotype : Means, SD, n, paired differences and p-values**

For serum OPG in Figure 4F, left panel, by the FDR adjusted p-values, *Tnfrsf11b*<sup>+/+</sup> has significantly higher values on average than *Tnfrsf11b*<sup>-/-</sup> (p<0.0001). *Tnfrsf11b*<sup>E/E</sup> (*Sost*) has significantly higher values on average than *Sost*-Cre;*Tnfrsf11b*<sup>E/E</sup> (p=0.0410).

The (1-2)-(3-4) and (1-2)-(5-6) difference of differences contrasts are also statistically significant (p<0.0001, <0.0001, adjusted p-values respectively).

| <i>Dep. Var.</i> | <i>Type</i> | <i>Test/Level of geno</i>                           | <i>n</i> | <i>Mean</i> | <i>Std Dev</i> | <i>2nd level of geno</i>                            | <i>Difference of means</i> | <i>p-value</i> | <i>Adjusted p-value</i> |
|------------------|-------------|-----------------------------------------------------|----------|-------------|----------------|-----------------------------------------------------|----------------------------|----------------|-------------------------|
| <i>opg_elisa</i> | Test        | S-W Normality, obser                                | .        | .           | .              |                                                     | . 0.0001*                  | .              |                         |
|                  | Test        | S-W Normality, resid                                | .        | .           | .              |                                                     | . 0.5460                   | .              |                         |
|                  | Test        | Equal variance test                                 | .        | .           | .              |                                                     | . 0.0640                   | .              |                         |
|                  | Mean        | 1) <i>Tnfrsf11b</i> <sup>+/+</sup>                  | 6        | 558.04      | 127.74         |                                                     | . .                        | .              |                         |
|                  | Mean        | 2) <i>Tnfrsf11b</i> <sup>-/-</sup>                  | 6        | 0.00        | 0.00           |                                                     | . .                        | .              |                         |
|                  | Mean        | 3) <i>Tnfrsf11b</i> <sup>ff</sup> ( <i>Dmp1</i> )   | 6        | 526.46      | 71.03          |                                                     | . .                        | .              |                         |
|                  | Mean        | 4) <i>Dmp1</i> -Cre; <i>Tnfrsf11b</i> <sup>ff</sup> | 11       | 472.80      | 93.91          |                                                     | . .                        | .              |                         |
|                  | Mean        | 5) <i>Tnfrsf11b</i> <sup>ff</sup> ( <i>Sost</i> )   | 6        | 573.75      | 44.59          |                                                     | . .                        | .              |                         |
|                  | Mean        | 6) <i>Sost</i> -Cre; <i>Tnfrsf11b</i> <sup>ff</sup> | 9        | 477.45      | 67.01          |                                                     | . .                        | .              |                         |
|                  | Diff        | 1) <i>Tnfrsf11b</i> <sup>+/+</sup>                  | .        | .           | .              | 2) <i>Tnfrsf11b</i> <sup>-/-</sup>                  | 558.04                     | <.0001*        | <.0001*                 |
|                  | Diff        | 3) <i>Tnfrsf11b</i> <sup>ff</sup> ( <i>Dmp1</i> )   | .        | .           | .              | 4) <i>Dmp1</i> -Cre; <i>Tnfrsf11b</i> <sup>ff</sup> | 53.66                      | 0.1921         | 0.1921                  |
|                  | Diff        | 5) <i>Tnfrsf11b</i> <sup>ff</sup> ( <i>Sost</i> )   | .        | .           | .              | 6) <i>Sost</i> -Cre; <i>Tnfrsf11b</i> <sup>ff</sup> | 96.30                      | 0.0273*        | 0.0410*                 |
|                  | Contrast    | (1-2)-(3-4)                                         | .        | 504.38      | 61.20          |                                                     | . <.0001*                  | <.0001*        |                         |
|                  | Contrast    | (1-2)-(5-6)                                         | .        | 461.74      | 62.24          |                                                     | . <.0001*                  | <.0001*        |                         |
|                  | Contrast    | (3-4)-(5-6)                                         | .        | -42.64      | 58.25          |                                                     | . 0.4687                   | 0.4687         |                         |

**Figure 4F, right panel: One-way ANOVA: Square Root transformed Serum RANKL = Genotype : Means, SD, n, paired differences and p-values**

For Square Root transformed serum RANKL in Figure 4F, right panel, by the FDR adjusted p-values, *Tnfrsf11b*<sup>+/+</sup> has significantly lower values on average than *Tnfrsf11b*<sup>-/-</sup> (p<0.0001). *Tnfrsf11b*<sup>f/f</sup> (*Dmp1*) has significantly lower values on average than *Dmp1-Cre;Tnfrsf11b*<sup>f/f</sup> (p<=0.0072).

The (1-2)-(3-4) and (1-2)-(5-6) difference of differences contrasts are also statistically significant (p<0.0001, <0.0001, adjusted p-values respectively).

| <i>Dep. Var.</i>       | <i>Type</i> | <i>Test/Level of geno</i>                          | <i>n</i> | <i>Mean</i> | <i>Std Dev</i> | <i>2nd level of geno</i>                    | <i>Difference of means</i> | <i>p-value</i> | <i>Adjusted p-value</i> |
|------------------------|-------------|----------------------------------------------------|----------|-------------|----------------|---------------------------------------------|----------------------------|----------------|-------------------------|
| <i>sqr_rankl_elisa</i> | Test        | S-W Normality, obser                               | .        | .           | .              |                                             | .                          | 0.0001*        | .                       |
|                        | Test        | S-W Normality, resid                               | .        | .           | .              |                                             | .                          | 0.8537         | .                       |
|                        | Test        | Equal variance test                                | .        | .           | .              |                                             | .                          | 0.3601         | .                       |
|                        | Mean        | 1) <i>Tnfrsf11b</i> <sup>+/+</sup>                 | 6        | 4.24        | 3.75           |                                             | .                          | .              | .                       |
|                        | Mean        | 2) <i>Tnfrsf11b</i> <sup>-/-</sup>                 | 5        | 42.95       | 1.80           |                                             | .                          | .              | .                       |
|                        | Mean        | 3) <i>Tnfrsf11b</i> <sup>f/f</sup> ( <i>Dmp1</i> ) | 5        | 2.38        | 3.84           |                                             | .                          | .              | .                       |
|                        | Mean        | 4) <i>Dmp1-Cre;Tnfrsf11b</i> <sup>f/f</sup>        | 9        | 7.15        | 3.26           |                                             | .                          | .              | .                       |
|                        | Mean        | 5) <i>Tnfrsf11b</i> <sup>f/f</sup> ( <i>Sost</i> ) | 6        | 7.73        | 2.46           |                                             | .                          | .              | .                       |
|                        | Mean        | 6) <i>Sost-Cre;Tnfrsf11b</i> <sup>f/f</sup>        | 9        | 9.88        | 1.39           |                                             | .                          | .              | .                       |
|                        | Diff        | 1) <i>Tnfrsf11b</i> <sup>+/+</sup>                 | .        | .           | .              | 2) <i>Tnfrsf11b</i> <sup>-/-</sup>          | -38.71                     | <.0001*        | <.0001*                 |
|                        | Diff        | 3) <i>Tnfrsf11b</i> <sup>f/f</sup> ( <i>Dmp1</i> ) | .        | .           | .              | 4) <i>Dmp1-Cre;Tnfrsf11b</i> <sup>f/f</sup> | -4.77                      | 0.0048*        | 0.0072*                 |
|                        | Diff        | 5) <i>Tnfrsf11b</i> <sup>f/f</sup> ( <i>Sost</i> ) | .        | .           | .              | 6) <i>Sost-Cre;Tnfrsf11b</i> <sup>f/f</sup> | -2.15                      | 0.1591         | 0.1591                  |
|                        | Contrast    | (1-2)-(3-4)                                        | .        | -           | 2.33           |                                             | .                          | <.0001*        | <.0001*                 |
|                        |             |                                                    |          | 33.94       |                |                                             |                            |                |                         |
|                        | Contrast    | (1-2)-(5-6)                                        | .        | -           | 2.28           |                                             | .                          | <.0001*        | <.0001*                 |
|                        |             |                                                    | 36.56    |             |                |                                             |                            |                |                         |
| Contrast               | (3-4)-(5-6) | .                                                  | -2.62    | 2.17        |                | .                                           | 0.2372                     | 0.2372         |                         |

**Supplementary Figure 1: Two-sample t-tests between genotypes**

By two-sample t-tests, or Wilcoxon Rank Sum tests where data were not normal, *Tnfrsf11b*<sup>+/+</sup> genotype animals showed statistically significantly higher on average values of female femur cortical thickness (p<0.001), female L4 cortical thickness (p<0.001), female femur cancellous BV/TV (p=0.0012), female L4 cancellous BV/TV (p=0.0034), male femur cortical thickness (p=0.0057), male L4 cortical thickness (p<0.001), male femur cancellous BV/TV (p<0.001), and male L4 cancellous BV/TV (p<0.001) than *Tnfrsf11b*<sup>-/-</sup> genotype animals.

| Analysis Variable                | Genotype                        | n | Std.  |      | Median  | Minimum | Maximum | Test                    | p-value |
|----------------------------------|---------------------------------|---|-------|------|---------|---------|---------|-------------------------|---------|
|                                  |                                 |   | Mean  | Dev. |         |         |         |                         |         |
| Female Femur Cortical Thickness. | <i>Tnfrsf11b</i> <sup>-/-</sup> | 7 | 0.09  | 0.01 | 0.09600 | 0.0670  | 0.1140  | t-test, equal variances | <0.001* |
|                                  | <i>Tnfrsf11b</i> <sup>+/+</sup> | 6 | 0.13  | 0.01 | 0.12400 | 0.1140  | 0.1380  |                         |         |
|                                  | Difference                      | . | -0.03 | 0.01 | .       | .       | .       |                         |         |

| Analysis Variable            | Genotype                        | n | Std.  |      | Median  | Minimum | Maximum | Test                    | p-value |
|------------------------------|---------------------------------|---|-------|------|---------|---------|---------|-------------------------|---------|
|                              |                                 |   | Mean  | Dev. |         |         |         |                         |         |
| Female L4 Cortical Thickness | <i>Tnfrsf11b</i> <sup>-/-</sup> | 7 | 0.04  | 0.01 | 0.04100 | 0.0370  | 0.0540  | t-test, equal variances | <0.001* |
|                              | <i>Tnfrsf11b</i> <sup>+/+</sup> | 6 | 0.06  | 0.00 | 0.05900 | 0.0540  | 0.0600  |                         |         |
|                              | Difference                      | . | -0.02 | 0.00 | .       | .       | .       |                         |         |

| Analysis Variable             | Genotype                        | n | Std.  |      | Median  | Minimum | Maximum | Test                      | p-value |
|-------------------------------|---------------------------------|---|-------|------|---------|---------|---------|---------------------------|---------|
|                               |                                 |   | Mean  | Dev. |         |         |         |                           |         |
| Female Femur Cancellous BV/TV | <i>Tnfrsf11b</i> <sup>-/-</sup> | 7 | 0.00  | 0.00 | 0.00100 | 0.0001  | 0.0044  | t-test, unequal variances | 0.0012* |
|                               | <i>Tnfrsf11b</i> <sup>+/+</sup> | 6 | 0.04  | 0.01 | 0.04085 | 0.0195  | 0.0595  |                           |         |
|                               | Difference                      | . | -0.04 | 0.01 | .       | .       | .       |                           |         |

| Analysis Variable          | Genotype                        | n | Std. |      | Median  | Minimum | Maximum | Test          | p-value |
|----------------------------|---------------------------------|---|------|------|---------|---------|---------|---------------|---------|
|                            |                                 |   | Mean | Dev. |         |         |         |               |         |
| Female L4 Cancellous BV/TV | <i>Tnfrsf11b</i> <sup>+/+</sup> | 6 | 0.17 | 0.02 | 0.18735 | 0.1373  | 0.1912  | Rank Sum test | 0.0034* |
|                            | <i>Tnfrsf11b</i> <sup>-/-</sup> | 7 | 0.06 | 0.01 | 0.06440 | 0.0394  | 0.0775  |               |         |
|                            | Difference                      | . | 0.11 | 0.02 | .       | .       | .       |               |         |



**Supplementary Figure 1: Two-sample t-tests between genotypes**

| Analysis Variable              | Genotype                 | n | Std. |      | Median  | Minimum | Maximum | Test                    | p-value |
|--------------------------------|--------------------------|---|------|------|---------|---------|---------|-------------------------|---------|
|                                |                          |   | Mean | Dev. |         |         |         |                         |         |
| Male Femur Cortical Thickness. | Tnfrsf11b <sup>+/+</sup> | 6 | 0.13 | 0.01 | 0.12950 | 0.1180  | 0.1390  | t-test, equal variances | 0.0057* |
|                                | Tnfrsf11b <sup>-/-</sup> | 4 | 0.10 | 0.02 | 0.09550 | 0.0880  | 0.1220  |                         |         |
|                                | Difference               | . | 0.03 | 0.01 | .       | .       | .       |                         |         |

| Analysis Variable          | Genotype                 | n | Std. |      | Median  | Minimum | Maximum | Test                    | p-value |
|----------------------------|--------------------------|---|------|------|---------|---------|---------|-------------------------|---------|
|                            |                          |   | Mean | Dev. |         |         |         |                         |         |
| Male L4 Cortical Thickness | Tnfrsf11b <sup>+/+</sup> | 7 | 0.06 | 0.00 | 0.05900 | 0.0570  | 0.0650  | t-test, equal variances | <0.001* |
|                            | Tnfrsf11b <sup>-/-</sup> | 4 | 0.04 | 0.00 | 0.03800 | 0.0350  | 0.0400  |                         |         |
|                            | Difference               | . | 0.02 | 0.00 | .       | .       | .       |                         |         |

| Analysis Variable           | Genotype                 | n | Std. |      | Median  | Minimum | Maximum | Test                      | p-value |
|-----------------------------|--------------------------|---|------|------|---------|---------|---------|---------------------------|---------|
|                             |                          |   | Mean | Dev. |         |         |         |                           |         |
| Male Femur Cancellous BV/TV | Tnfrsf11b <sup>+/+</sup> | 6 | 0.05 | 0.01 | 0.05360 | 0.0394  | 0.0650  | t-test, unequal variances | <0.001* |
|                             | Tnfrsf11b <sup>-/-</sup> | 4 | 0.00 | 0.00 | 0.00190 | 0.0001  | 0.0044  |                           |         |
|                             | Difference               | . | 0.05 | 0.01 | .       | .       | .       |                           |         |

| Analysis Variable        | Genotype                 | n | Std. |      | Median  | Minimum | Maximum | Test                    | p-value |
|--------------------------|--------------------------|---|------|------|---------|---------|---------|-------------------------|---------|
|                          |                          |   | Mean | Dev. |         |         |         |                         |         |
| Male L4 Cancellous BV/TV | Tnfrsf11b <sup>+/+</sup> | 7 | 0.19 | 0.01 | 0.18940 | 0.1645  | 0.2063  | t-test, equal variances | <0.001* |
|                          | Tnfrsf11b <sup>-/-</sup> | 4 | 0.06 | 0.01 | 0.05615 | 0.0531  | 0.0779  |                         |         |
|                          | Difference               | . | 0.13 | 0.01 | .       | .       | .       |                         |         |

**Supplementary Figure 2A, left panel: One-way ANOVA: Femur Cortical Thickness = Genotype : Means, SD, n, paired differences and p-values**

For all results in Supplementary Figure 2, a One-Way ANOVA model was fitted to the 4 genotypes. Normality and Equal Variance assumptions of the residuals was test and passed in each case. Pairwise comparisons were adjusted by Tukey procedure and the 'Difference of Differences' contrast was also estimated.

For femur cortical thickness in Supplementary Figure 2A, left panel, by the Tukey p-values, *Tnfrsf11b*<sup>+/+</sup> has significantly higher values on average than *Tnfrsf11b*<sup>-/-</sup> (p<0.0001). *Tnfrsf11b*<sup>-/-</sup> has significantly lower values on average than CD19-Cre (p<0.0001) & CD19-Cre;*Tnfrsf11b*<sup>ff/ff</sup> (p<0.0001).

The (1-2)-(3-4) difference of differences contrast is also statistically significant (p<0.0001).

| Type     | Test/Level of geno                            | n  | Mean | Std Dev | 2nd level of geno                             | Difference of means | p-value | Tukey p-value | Adjusted DSCF p-value (nonparam.) |
|----------|-----------------------------------------------|----|------|---------|-----------------------------------------------|---------------------|---------|---------------|-----------------------------------|
| Test     | S-W Normality, observed                       | .  | .    | .       |                                               | .                   | 0.0144* | .             | .                                 |
| Test     | S-W Normality, residuals                      | .  | .    | .       |                                               | .                   | 0.5791  | .             | .                                 |
| Test     | Equal variance test                           | .  | .    | .       |                                               | .                   | 0.5431  | .             | .                                 |
| Mean     | 1) <i>Tnfrsf11b</i> <sup>+/+</sup>            | 6  | 0.22 | 0.01    |                                               | .                   | .       | .             | .                                 |
| Mean     | 2) <i>Tnfrsf11b</i> <sup>-/-</sup>            | 6  | 0.16 | 0.02    |                                               | .                   | .       | .             | .                                 |
| Mean     | 3)CD19-Cre                                    | 10 | 0.20 | 0.01    |                                               | .                   | .       | .             | .                                 |
| Mean     | 4)CD19-Cre; <i>Tnfrsf11b</i> <sup>ff/ff</sup> | 8  | 0.20 | 0.01    |                                               | .                   | .       | .             | .                                 |
| Diff     | 1) <i>Tnfrsf11b</i> <sup>+/+</sup>            | .  | .    | .       | 2) <i>Tnfrsf11b</i> <sup>-/-</sup>            | 0.05                | <.0001* | <.0001*       | 0.0406*                           |
| Diff     | 1) <i>Tnfrsf11b</i> <sup>+/+</sup>            | .  | .    | .       | 3)CD19-Cre                                    | 0.01                | 0.1155  | 0.3809        | 0.4010                            |
| Diff     | 1) <i>Tnfrsf11b</i> <sup>+/+</sup>            | .  | .    | .       | 4)CD19-Cre; <i>Tnfrsf11b</i> <sup>ff/ff</sup> | 0.01                | 0.0880  | 0.3086        | 0.4010                            |
| Diff     | 2) <i>Tnfrsf11b</i> <sup>-/-</sup>            | .  | .    | .       | 3)CD19-Cre                                    | -0.04               | <.0001* | <.0001*       | 0.0315*                           |
| Diff     | 2) <i>Tnfrsf11b</i> <sup>-/-</sup>            | .  | .    | .       | 4)CD19-Cre; <i>Tnfrsf11b</i> <sup>ff/ff</sup> | -0.04               | <.0001* | <.0001*       | 0.0315*                           |
| Diff     | 3)CD19-Cre                                    | .  | .    | .       | 4)CD19-Cre; <i>Tnfrsf11b</i> <sup>ff/ff</sup> | 0.00                | 0.8078  | 0.9947        | 0.9507                            |
| Contrast | (1-2)-(3-4)                                   | .  | 0.05 | 0.01    |                                               | .                   | <.0001* | .             | .                                 |

**Supplementary Figure 2A, right panel: One-way ANOVA: L4 Cortical Thickness = Genotype : Means, SD, n, paired differences and p-values**

For L4 cortical thickness in Supplementary Figure 2A, right panel, by the Tukey p-values, *Tnfrsf11b*<sup>+/+</sup> has significantly higher values on average than *Tnfrsf11b*<sup>-/-</sup> (p<0.0001) and CD19-Cre (p=0.0045). *Tnfrsf11b*<sup>-/-</sup> has significantly lower values on average than CD19-Cre (p<0.0001) & CD19-Cre;*Tnfrsf11b*<sup>f/f</sup> (p<0.0001).

The (1-2)-(3-4) difference of differences contrast is also statistically significant (p<0.0001).

| Type     | Test/Level of geno                          | n  | Mean | Std Dev | 2nd level of geno                           | Difference of means | p-value | Tukey p-value | Adjusted DSCF p-value (nonparam.) |
|----------|---------------------------------------------|----|------|---------|---------------------------------------------|---------------------|---------|---------------|-----------------------------------|
| Test     | S-W Normality, observed                     | .  | .    | .       |                                             | .                   | 0.0052* | .             | .                                 |
| Test     | S-W Normality, residuals                    | .  | .    | .       |                                             | .                   | 0.3458  | .             | .                                 |
| Test     | Equal variance test                         | .  | .    | .       |                                             | .                   | 0.7702  | .             | .                                 |
| Mean     | 1) <i>Tnfrsf11b</i> <sup>+/+</sup>          | 6  | 0.09 | 0.01    |                                             | .                   | .       | .             | .                                 |
| Mean     | 2) <i>Tnfrsf11b</i> <sup>-/-</sup>          | 6  | 0.06 | 0.01    |                                             | .                   | .       | .             | .                                 |
| Mean     | 3)CD19-Cre                                  | 10 | 0.08 | 0.01    |                                             | .                   | .       | .             | .                                 |
| Mean     | 4)CD19-Cre; <i>Tnfrsf11b</i> <sup>f/f</sup> | 8  | 0.08 | 0.01    |                                             | .                   | .       | .             | .                                 |
| Diff     | 1) <i>Tnfrsf11b</i> <sup>+/+</sup>          | .  | .    | .       | 2) <i>Tnfrsf11b</i> <sup>-/-</sup>          | 0.04                | <.0001* | <.0001*       | 0.0400*                           |
| Diff     | 1) <i>Tnfrsf11b</i> <sup>+/+</sup>          | .  | .    | .       | 3)CD19-Cre                                  | 0.01                | 0.0045* | 0.0219*       | 0.1012                            |
| Diff     | 1) <i>Tnfrsf11b</i> <sup>+/+</sup>          | .  | .    | .       | 4)CD19-Cre; <i>Tnfrsf11b</i> <sup>f/f</sup> | 0.01                | 0.0451* | 0.1781        | 0.3203                            |
| Diff     | 2) <i>Tnfrsf11b</i> <sup>-/-</sup>          | .  | .    | .       | 3)CD19-Cre                                  | -0.03               | <.0001* | <.0001*       | 0.0305*                           |
| Diff     | 2) <i>Tnfrsf11b</i> <sup>-/-</sup>          | .  | .    | .       | 4)CD19-Cre; <i>Tnfrsf11b</i> <sup>f/f</sup> | -0.03               | <.0001* | <.0001*       | 0.0305*                           |
| Diff     | 3)CD19-Cre                                  | .  | .    | .       | 4)CD19-Cre; <i>Tnfrsf11b</i> <sup>f/f</sup> | -0.00               | 0.3310  | 0.7560        | 0.8299                            |
| Contrast | (1-2)-(3-4)                                 | .  | 0.04 | 0.00    |                                             | .                   | <.0001* | .             | .                                 |

**Supplementary Figure 2B, left panel: One-way ANOVA: Femur Cancellous BV/TV = Genotype : Means, SD, n, paired differences and p-values**

For femur cancellous BV/TV in Supplementary Figure 2B, left panel, by the Tukey p-values, Tnfrsf11b<sup>+/+</sup> has significantly higher values on average than Tnfrsf11b<sup>-/-</sup> (p<0.0001). Tnfrsf11b<sup>-/-</sup> has significantly lower values on average than CD19-Cre (p<0.0001) & CD19-Cre;Tnfrsf11b<sup>f/f</sup> (p<0.0001).

The (1-2)-(3-4) difference of differences contrast is also statistically significant (p<0.0001).

| Type     | Test/Level of geno                  | n  | Mean | Std Dev | 2nd level of geno                   | Difference of means | p-value | Tukey p-value | Adjusted DSCF p-value (nonparam.) |
|----------|-------------------------------------|----|------|---------|-------------------------------------|---------------------|---------|---------------|-----------------------------------|
| Test     | S-W Normality, observed             | .  | .    | .       |                                     | .                   | 0.0016* | .             | .                                 |
| Test     | S-W Normality, residuals            | .  | .    | .       |                                     | .                   | 0.2197  | .             | .                                 |
| Test     | Equal variance test                 | .  | .    | .       |                                     | .                   | 0.3279  | .             | .                                 |
| Mean     | 1)Tnfrsf11b <sup>+/+</sup>          | 6  | 0.04 | 0.01    |                                     | .                   | .       | .             | .                                 |
| Mean     | 2)Tnfrsf11b <sup>-/-</sup>          | 6  | 0.00 | 0.00    |                                     | .                   | .       | .             | .                                 |
| Mean     | 3)CD19-Cre                          | 10 | 0.05 | 0.01    |                                     | .                   | .       | .             | .                                 |
| Mean     | 4)CD19-Cre;Tnfrsf11b <sup>f/f</sup> | 8  | 0.05 | 0.01    |                                     | .                   | .       | .             | .                                 |
| Diff     | 1)Tnfrsf11b <sup>+/+</sup>          | .  | .    | .       | 2)Tnfrsf11b <sup>-/-</sup>          | 0.04                | <.0001* | <.0001*       | 0.0406*                           |
| Diff     | 1)Tnfrsf11b <sup>+/+</sup>          | .  | .    | .       | 3)CD19-Cre                          | -0.01               | 0.1048  | 0.3536        | 0.5450                            |
| Diff     | 1)Tnfrsf11b <sup>+/+</sup>          | .  | .    | .       | 4)CD19-Cre;Tnfrsf11b <sup>f/f</sup> | -0.00               | 0.4175  | 0.8427        | 0.7811                            |
| Diff     | 2)Tnfrsf11b <sup>-/-</sup>          | .  | .    | .       | 3)CD19-Cre                          | -0.05               | <.0001* | <.0001*       | 0.0311*                           |
| Diff     | 2)Tnfrsf11b <sup>-/-</sup>          | .  | .    | .       | 4)CD19-Cre;Tnfrsf11b <sup>f/f</sup> | -0.04               | <.0001* | <.0001*       | 0.0311*                           |
| Diff     | 3)CD19-Cre                          | .  | .    | .       | 4)CD19-Cre;Tnfrsf11b <sup>f/f</sup> | 0.00                | 0.3806  | 0.8090        | 0.9388                            |
| Contrast | (1-2)-(3-4)                         | .  | 0.04 | 0.01    |                                     | .                   | <.0001* | .             | .                                 |

**Supplementary Figure 2B, right panel: One-way ANOVA: L4 Cancellous BV/TV = Genotype : Means, SD, n, paired differences and p-values**

For L4 cancellous BV/TV in Supplementary Figure 2B, right panel, by the Tukey p-values, *Tnfrsf11b*<sup>+/+</sup> has significantly higher values on average than *Tnfrsf11b*<sup>-/-</sup> (p<0.0001), but has significantly lower values on average than CD19-Cre (p=0.0003) & CD19-Cre;*Tnfrsf11b*<sup>f/f</sup> (p<0.0001). *Tnfrsf11b*<sup>-/-</sup> has significantly lower values on average than CD19-Cre (p=0.0003) & CD19-Cre;*Tnfrsf11b*<sup>f/f</sup> (p<0.0001).

The (1-2)-(3-4) difference of differences contrast is also statistically significant (p<0.0001).

| Type     | Test/Level of geno                          | n  | Mean | Std Dev | 2nd level of geno                           | Difference of means | p-value | Tukey p-value | Adjusted DSCF p-value (nonparam.) |
|----------|---------------------------------------------|----|------|---------|---------------------------------------------|---------------------|---------|---------------|-----------------------------------|
| Test     | S-W Normality, observed                     | .  | .    | .       |                                             | .                   | 0.0001* | .             | .                                 |
| Test     | S-W Normality, residuals                    | .  | .    | .       |                                             | .                   | 0.1235  | .             | .                                 |
| Test     | Equal variance test                         | .  | .    | .       |                                             | .                   | 0.2161  | .             | .                                 |
| Mean     | 1) <i>Tnfrsf11b</i> <sup>+/+</sup>          | 6  | 0.18 | 0.02    |                                             | .                   | .       | .             | .                                 |
| Mean     | 2) <i>Tnfrsf11b</i> <sup>-/-</sup>          | 6  | 0.02 | 0.01    |                                             | .                   | .       | .             | .                                 |
| Mean     | 3)CD19-Cre                                  | 10 | 0.25 | 0.02    |                                             | .                   | .       | .             | .                                 |
| Mean     | 4)CD19-Cre; <i>Tnfrsf11b</i> <sup>f/f</sup> | 8  | 0.25 | 0.03    |                                             | .                   | .       | .             | .                                 |
| Diff     | 1) <i>Tnfrsf11b</i> <sup>+/+</sup>          | .  | .    | .       | 2) <i>Tnfrsf11b</i> <sup>-/-</sup>          | 0.16                | <.0001* | <.0001*       | 0.0247*                           |
| Diff     | 1) <i>Tnfrsf11b</i> <sup>+/+</sup>          | .  | .    | .       | 3)CD19-Cre                                  | -0.07               | <.0001* | <.0001*       | 0.0237*                           |
| Diff     | 1) <i>Tnfrsf11b</i> <sup>+/+</sup>          | .  | .    | .       | 4)CD19-Cre; <i>Tnfrsf11b</i> <sup>f/f</sup> | -0.06               | <.0001* | <.0001*       | 0.0237*                           |
| Diff     | 2) <i>Tnfrsf11b</i> <sup>-/-</sup>          | .  | .    | .       | 3)CD19-Cre                                  | -0.23               | <.0001* | <.0001*       | 0.0237*                           |
| Diff     | 2) <i>Tnfrsf11b</i> <sup>-/-</sup>          | .  | .    | .       | 4)CD19-Cre; <i>Tnfrsf11b</i> <sup>f/f</sup> | -0.23               | <.0001* | <.0001*       | 0.0237*                           |
| Diff     | 3)CD19-Cre                                  | .  | .    | .       | 4)CD19-Cre; <i>Tnfrsf11b</i> <sup>f/f</sup> | 0.00                | 0.8299  | 0.9963        | 0.9510                            |
| Contrast | (1-2)-(3-4)                                 | .  | 0.16 | 0.02    |                                             | .                   | <.0001* | .             | .                                 |

**Supplementary Figure 2C: Two-sample t-tests on serum OPG and RANKL, tested by genotypes, within each age.**

No significant differences between genotypes were detected for either variable or age.

| <i>Analysis Variable</i> | <i>Age group</i> | <i>Genotype</i>                     | <i>n</i> | <i>Mean</i> | <i>Std. Dev.</i> | <i>Test</i>             | <i>p-value</i> |
|--------------------------|------------------|-------------------------------------|----------|-------------|------------------|-------------------------|----------------|
| OPG_ELISA                | A)5 weeks        | A) CD19-Cre;Tnfrsf11b <sup>ff</sup> | 8        | 3222.37     | 371.70           | t-test, equal variances | 0.6506         |
|                          |                  | B) CD19-Cre                         | 5        | 3323.18     | 393.58           |                         |                |
|                          |                  | Difference                          | .        | -100.80     | 379.80           |                         |                |

| <i>Analysis Variable</i> | <i>Age group</i> | <i>Genotype</i>                     | <i>n</i> | <i>Mean</i> | <i>Std. Dev.</i> | <i>Test</i>             | <i>p-value</i> |
|--------------------------|------------------|-------------------------------------|----------|-------------|------------------|-------------------------|----------------|
| OPG_ELISA                | B)4 months       | A) CD19-Cre;Tnfrsf11b <sup>ff</sup> | 7        | 2556.74     | 597.49           | t-test, equal variances | 0.2233         |
|                          |                  | B) CD19-Cre                         | 8        | 2941.20     | 566.07           |                         |                |
|                          |                  | Difference                          | .        | -384.45     | 580.78           |                         |                |

| <i>Analysis Variable</i> | <i>Age group</i> | <i>Genotype</i>                     | <i>n</i> | <i>Mean</i> | <i>Std. Dev.</i> | <i>Test</i>             | <i>p-value</i> |
|--------------------------|------------------|-------------------------------------|----------|-------------|------------------|-------------------------|----------------|
| RANKL_ELISA              | A)5 weeks        | A) CD19-Cre;Tnfrsf11b <sup>ff</sup> | 8        | 92.49       | 52.03            | t-test, equal variances | 0.5358         |
|                          |                  | B) CD19-Cre                         | 5        | 74.78       | 41.94            |                         |                |
|                          |                  | Difference                          | .        | 17.71       | 48.61            |                         |                |

| <i>Analysis Variable</i> | <i>Age group</i> | <i>Genotype</i>                     | <i>n</i> | <i>Mean</i> | <i>Std. Dev.</i> | <i>Test</i>             | <i>p-value</i> |
|--------------------------|------------------|-------------------------------------|----------|-------------|------------------|-------------------------|----------------|
| RANKL_ELISA              | B)4 months       | A) CD19-Cre;Tnfrsf11b <sup>ff</sup> | 7        | 119.74      | 65.83            | t-test, equal variances | 0.1778         |
|                          |                  | B) CD19-Cre                         | 7        | 80.82       | 29.00            |                         |                |
|                          |                  | Difference                          | .        | 38.92       | 50.87            |                         |                |

**Supplementary Figure 3A: Two-sample tests within tissue types**

By a two-sample t-test, the CD19-Cre genotype showed statistically significantly higher (mean of 1.02 vs. 0.15) on average *Tnfrsf11b* exon 2 than the CD19-Cre;*Tnfrsf11b*<sup>f/f</sup> genotype within +CD19 Cells (p<0.001).

By a two-sample Wilcoxon Rank Sum test (used in place of t-test due to non-normal data), the CD19-Cre and CD19-Cre;*Tnfrsf11b*<sup>f/f</sup> genotypes showed no statistically significant difference in *Tnfrsf11b* exon 2 within -CD19 Cells (p=0.817).

| Analysis Variable       | CD19 + or - (only for b cells) | geno                         | n | Std. |      | Median  | Minimum | Maximum | Test                    | p-value |
|-------------------------|--------------------------------|------------------------------|---|------|------|---------|---------|---------|-------------------------|---------|
|                         |                                |                              |   | Mean | Dev. |         |         |         |                         |         |
| <i>Tnfrsf11b</i> exon 2 | +CD19 Cells                    | A)CD19-Cre                   | 2 | 1.02 | 0.08 | 1.02385 | 0.96569 | 1.08202 | t-test, equal variances | <0.001* |
|                         |                                | B)CD19-Cre; <i>Tnfrsf11b</i> | 4 | 0.15 | 0.04 | 0.14835 | 0.11406 | 0.20778 |                         |         |
|                         |                                | Difference                   | . | 0.87 | 0.05 | .       | .       | .       |                         |         |

| Analysis Variable       | CD19 + or - (only for b cells) | geno                         | n | Std. |      | Median  | Minimum | Maximum | Test          | p-value |
|-------------------------|--------------------------------|------------------------------|---|------|------|---------|---------|---------|---------------|---------|
|                         |                                |                              |   | Mean | Dev. |         |         |         |               |         |
| <i>Tnfrsf11b</i> exon 2 | -CD19 Cells                    | A)CD19-Cre                   | 2 | 0.98 | 0.11 | 0.97615 | 0.90112 | 1.05117 | Rank Sum test | 0.817   |
|                         |                                | B)CD19-Cre; <i>Tnfrsf11b</i> | 4 | 0.87 | 0.12 | 0.92558 | 0.69292 | 0.93260 |               |         |
|                         |                                | Difference                   | . | 0.11 | 0.11 | .       | .       | .       |               |         |

**Supplementary Figure 3A: Two-sample tests within tissue types**

By two-sample t-tests, the CD19-Cre and CD19-Cre;Tnfrsf11b<sup>f/f</sup> genotypes showed no statistically significant differences in *Tnfrsf11b* exon 2 in Cortical Bone(p=0.4927), Liver(p=0.9639), or Muscle(p=0.9752) tissues.

| <i>Analysis Variable</i> | <i>Tissue</i>        | <i>geno</i>                         | <i>n</i> | <i>Mean</i> | <i>Std. Dev.</i> | <i>Median</i> | <i>Minimum</i> | <i>Maximum</i> | <i>Test</i>             | <i>p-value</i> |
|--------------------------|----------------------|-------------------------------------|----------|-------------|------------------|---------------|----------------|----------------|-------------------------|----------------|
| <i>Tnfrsf11b</i> exon 2  | <i>Cortical Bone</i> | A)CD19-Cre                          | 6        | 1.00        | 0.21             | 1.01251       | 0.66708        | 1.25941        | t-test, equal variances | 0.4927         |
|                          |                      | B)CD19-Cre;Tnfrsf11b <sup>f/f</sup> | 6        | 0.93        | 0.12             | 0.93169       | 0.75074        | 1.11653        |                         |                |
|                          |                      | Difference                          | .        | 0.07        | 0.17             | .             | .              | .              |                         |                |

| <i>Analysis Variable</i> | <i>Tissue</i> | <i>geno</i>                         | <i>n</i> | <i>Mean</i> | <i>Std. Dev.</i> | <i>Median</i> | <i>Minimum</i> | <i>Maximum</i> | <i>Test</i>             | <i>p-value</i> |
|--------------------------|---------------|-------------------------------------|----------|-------------|------------------|---------------|----------------|----------------|-------------------------|----------------|
| <i>Tnfrsf11b</i> exon 2  | <i>Muscle</i> | A)CD19-Cre                          | 6        | 1.00        | 0.09             | 1.02754       | 0.87233        | 1.07537        | t-test, equal variances | 0.9752         |
|                          |               | B)CD19-Cre;Tnfrsf11b <sup>f/f</sup> | 5        | 1.00        | 0.10             | 0.97724       | 0.91252        | 1.17129        |                         |                |
|                          |               | Difference                          | .        | 0.00        | 0.09             | .             | .              | .              |                         |                |

| <i>Analysis Variable</i> | <i>Tissue</i> | <i>geno</i>                         | <i>n</i> | <i>Mean</i> | <i>Std. Dev.</i> | <i>Median</i> | <i>Minimum</i> | <i>Maximum</i> | <i>Test</i>             | <i>p-value</i> |
|--------------------------|---------------|-------------------------------------|----------|-------------|------------------|---------------|----------------|----------------|-------------------------|----------------|
| <i>Tnfrsf11b</i> exon 2  | <i>Liver</i>  | A)CD19-Cre                          | 6        | 1.00        | 0.07             | 1.00959       | 0.90246        | 1.08939        | t-test, equal variances | 0.9639         |
|                          |               | B)CD19-Cre;Tnfrsf11b <sup>f/f</sup> | 6        | 1.00        | 0.07             | 1.01593       | 0.92020        | 1.11368        |                         |                |
|                          |               | Difference                          | .        | -0.00       | 0.07             | .             | .              | .              |                         |                |



**Supplementary Figure 3B: Two-sample tests within tissue types**

By two-sample t-tests, the *Tnfrsf11b<sup>f/f</sup>* and *Dmp1-Cre;Tnfrsf11b<sup>f/f</sup>* genotypes showed statistically significant differences in *Tnfrsf11b* exon 2 in Cortical Bone ( $p < 0.001$ ), and Muscle ( $p < 0.001$ ) tissues, but not in Liver ( $p = 0.8254$ )

| Analysis Variable       | Tissue        | geno                                       | n | Mean | Std. Dev. | Median  | Minimum | Maximum | Test                    | p-value |
|-------------------------|---------------|--------------------------------------------|---|------|-----------|---------|---------|---------|-------------------------|---------|
| <i>Tnfrsf11b</i> exon 2 | Cortical Bone | A) <i>Tnfrsf11b<sup>f/f</sup></i>          | 4 | 1.00 | 0.11      | 0.99811 | 0.89824 | 1.10554 | t-test, equal variances | <0.001* |
|                         |               | B) <i>Dmp1-Cre;Tnfrsf11b<sup>f/f</sup></i> | 9 | 0.56 | 0.08      | 0.53837 | 0.47111 | 0.67429 |                         |         |
|                         |               | Difference                                 | . | 0.44 | 0.09      | .       | .       | .       |                         |         |

| Analysis Variable       | Tissue | geno                                       | n | Mean | Std. Dev. | Median  | Minimum | Maximum | Test                    | p-value |
|-------------------------|--------|--------------------------------------------|---|------|-----------|---------|---------|---------|-------------------------|---------|
| <i>Tnfrsf11b</i> exon 2 | Muscle | A) <i>Tnfrsf11b<sup>f/f</sup></i>          | 5 | 1.00 | 0.04      | 0.99362 | 0.94165 | 1.06412 | t-test, equal variances | <0.001* |
|                         |        | B) <i>Dmp1-Cre;Tnfrsf11b<sup>f/f</sup></i> | 4 | 0.63 | 0.04      | 0.63847 | 0.57283 | 0.66570 |                         |         |
|                         |        | Difference                                 | . | 0.37 | 0.04      | .       | .       | .       |                         |         |

| Analysis Variable       | Tissue | geno                                       | n  | Mean | Std. Dev. | Median  | Minimum | Maximum | Test                    | p-value |
|-------------------------|--------|--------------------------------------------|----|------|-----------|---------|---------|---------|-------------------------|---------|
| <i>Tnfrsf11b</i> exon 2 | Liver  | A) <i>Tnfrsf11b<sup>f/f</sup></i>          | 5  | 1.00 | 0.09      | 0.94463 | 0.90916 | 1.11537 | t-test, equal variances | 0.8254  |
|                         |        | B) <i>Dmp1-Cre;Tnfrsf11b<sup>f/f</sup></i> | 10 | 0.99 | 0.10      | 0.97570 | 0.84636 | 1.19746 |                         |         |
|                         |        | Difference                                 | .  | 0.01 | 0.10      | .       | .       | .       |                         |         |

**Supplementary Figure 3C: Two-sample tests within tissue types**

By two-sample t-tests, the *Tnfrsf11b<sup>f/f</sup>* genotypes shows statistically significantly higher values of *Tnfrsf11b* exon 2 on average than the *Sost-Cre;Tnfrsf11b<sup>f/f</sup>* genotype in Cortical Bone( $p < 0.001$ ), Liver( $p = 0.0207$ ), and Muscle( $p = 0.0419$ ) tissues.

| Analysis Variable       | Tissue        | geno                                       | n | Std. |      |         | Minimum | Maximum | Test                    | p-value |
|-------------------------|---------------|--------------------------------------------|---|------|------|---------|---------|---------|-------------------------|---------|
|                         |               |                                            |   | Mean | Dev. | Median  |         |         |                         |         |
| <i>Tnfrsf11b</i> exon 2 | Cortical Bone | A) <i>Tnfrsf11b<sup>f/f</sup></i>          | 6 | 1.00 | 0.08 | 0.99521 | 0.91012 | 1.12094 | t-test, equal variances | <0.001* |
|                         |               | B) <i>Sost-Cre;Tnfrsf11b<sup>f/f</sup></i> | 5 | 0.59 | 0.06 | 0.57029 | 0.52240 | 0.67102 |                         |         |
|                         |               | Difference                                 | . | 0.41 | 0.07 | .       | .       | .       |                         |         |

| Analysis Variable       | Tissue | geno                                       | n | Std. |      |         | Minimum | Maximum | Test                    | p-value |
|-------------------------|--------|--------------------------------------------|---|------|------|---------|---------|---------|-------------------------|---------|
|                         |        |                                            |   | Mean | Dev. | Median  |         |         |                         |         |
| <i>Tnfrsf11b</i> exon 2 | Muscle | A) <i>Tnfrsf11b<sup>f/f</sup></i>          | 6 | 1.00 | 0.11 | 0.98398 | 0.87690 | 1.17968 | t-test, equal variances | 0.0419* |
|                         |        | B) <i>Sost-Cre;Tnfrsf11b<sup>f/f</sup></i> | 8 | 0.84 | 0.14 | 0.87229 | 0.62817 | 1.02662 |                         |         |
|                         |        | Difference                                 | . | 0.16 | 0.13 | .       | .       | .       |                         |         |

| Analysis Variable       | Tissue | geno                                       | n | Mea  | Std. | Median  | Minimum | Maximum | Test                    | p-value |
|-------------------------|--------|--------------------------------------------|---|------|------|---------|---------|---------|-------------------------|---------|
|                         |        |                                            |   | n    | Dev. |         |         |         |                         |         |
| <i>Tnfrsf11b</i> exon 2 | Liver  | A) <i>Tnfrsf11b<sup>f/f</sup></i>          | 6 | 1.00 | 0.07 | 1.00495 | 0.90107 | 1.12299 | t-test, equal variances | 0.0207* |
|                         |        | B) <i>Sost-Cre;Tnfrsf11b<sup>f/f</sup></i> | 8 | 0.89 | 0.08 | 0.92926 | 0.73968 | 0.96115 |                         |         |
|                         |        | Difference                                 | . | 0.11 | 0.08 | .       | .       | .       |                         |         |

**Supplementary Figure 4A: One-way ANOVA: Rank-Transformed Female Femur Cortical Thickness = Genotype : Means, SD, n, paired differences and p-values**

For all results in Supplementary Figure 4, a One-Way ANOVA model was fitted to the 4 genotypes. Normality and Equal Variance assumptions of the residuals was tested. Transformations were used when those assumptions failed. Pairwise comparisons were adjusted by Tukey procedure and the 'Difference of Differences' contrast was also estimated.

For Rank-Transformed female femur cortical thickness in Supplementary Figure 4A, by the Tukey p-values, Dmp1-Cre has significantly higher values on average than Dmp1-Cre;Tnfrsf11b<sup>ε/ε</sup> (p=0.0033). Tnfrsf11b<sup>ε/ε</sup> has significantly higher values on average than Dmp1-Cre;Tnfrsf11b<sup>ε/ε</sup> (p=0.0287)

The (1-2)-(3-4) difference of differences contrast is also statistically significant (p=0.0021).

| Type     | Test/Level of geno                 | n | Mean   | Std Dev | 2nd level of geno                  | Difference of means | p-value | Tukey p-value | Adjusted DSCF p-value (nonparam.) |
|----------|------------------------------------|---|--------|---------|------------------------------------|---------------------|---------|---------------|-----------------------------------|
| Test     | S-W Normality, observed            | . | .      | .       |                                    | .                   | 0.4151  | .             | .                                 |
| Test     | S-W Normality, residuals           | . | .      | .       |                                    | .                   | 0.0661  | .             | .                                 |
| Test     | Equal variance test                | . | .      | .       |                                    | .                   | 0.4170  | .             | .                                 |
| Mean     | 1)Tnfrsf11b <sup>+/+</sup>         | 6 | 11.50  | 5.88    |                                    | .                   | .       | .             | .                                 |
| Mean     | 2)Dmp1-Cre                         | 6 | 17.25  | 5.69    |                                    | .                   | .       | .             | .                                 |
| Mean     | 3)Tnfrsf11b <sup>ff</sup>          | 5 | 14.70  | 5.35    |                                    | .                   | .       | .             | .                                 |
| Mean     | 4)Dmp1-Cre;Tnfrsf11b <sup>ff</sup> | 6 | 5.00   | 3.58    |                                    | .                   | .       | .             | .                                 |
| Diff     | 1)Tnfrsf11b <sup>+/+</sup>         | . | .      | .       | 2)Dmp1-Cre                         | -5.75               | 0.0705  | 0.2546        | 0.5644                            |
| Diff     | 1)Tnfrsf11b <sup>+/+</sup>         | . | .      | .       | 3)Tnfrsf11b <sup>ff</sup>          | -3.20               | 0.3220  | 0.7418        | 0.8425                            |
| Diff     | 1)Tnfrsf11b <sup>+/+</sup>         | . | .      | .       | 4)Dmp1-Cre;Tnfrsf11b <sup>ff</sup> | 6.50                | 0.0432* | 0.1687        | 0.4350                            |
| Diff     | 2)Dmp1-Cre                         | . | .      | .       | 3)Tnfrsf11b <sup>ff</sup>          | 2.55                | 0.4278  | 0.8488        | 0.8425                            |
| Diff     | 2)Dmp1-Cre                         | . | .      | .       | 4)Dmp1-Cre;Tnfrsf11b <sup>ff</sup> | 12.25               | 0.0006* | 0.0033*       | 0.1972                            |
| Diff     | 3)Tnfrsf11b <sup>ff</sup>          | . | .      | .       | 4)Dmp1-Cre;Tnfrsf11b <sup>ff</sup> | 9.70                | 0.0061* | 0.0287*       | 0.2434                            |
| Contrast | (1-2)-(3-4)                        | . | -15.45 | 4.35    |                                    | .                   | 0.0021* | .             | .                                 |

**Supplementary Figure 4B, left panel: One-way ANOVA: Square-root-Transformed Female Femur Cancellous BV/TV = Genotype : Means, SD, n, paired differences and p-values**

For Square-root-Transformed female femur cancellous BV/TV in Supplementary Figure 4B, left panel, by the Tukey p-values, *Tnfrsf11b*<sup>+/+</sup> has significantly higher values on average than *Dmp1-Cre;Tnfrsf11b*<sup>f/f</sup> (p=0.0006). *Dmp1-Cre* has significantly higher values on average than *Dmp1-Cre;Tnfrsf11b*<sup>f/f</sup> (p<0.0001). *Tnfrsf11b*<sup>f/f</sup> has significantly higher values on average than *Dmp1-Cre;Tnfrsf11b*<sup>f/f</sup> (p=0.0015).

The (1-2)-(3-4) difference of differences contrast is also statistically significant (p=0.0007).

| Type     | Test/Level of geno                          | n | Mean  | Std Dev | 2nd level of geno                           | Difference of means | p-value | Tukey p-value | Adjusted DSCF p-value (nonparam.) |
|----------|---------------------------------------------|---|-------|---------|---------------------------------------------|---------------------|---------|---------------|-----------------------------------|
| Test     | S-W Normality, observed                     | . | .     | .       |                                             | .                   | 0.6742  | .             | .                                 |
| Test     | S-W Normality, residuals                    | . | .     | .       |                                             | .                   | 0.7150  | .             | .                                 |
| Test     | Equal variance test                         | . | .     | .       |                                             | .                   | 0.1379  | .             | .                                 |
| Mean     | 1) <i>Tnfrsf11b</i> <sup>+/+</sup>          | 6 | 0.20  | 0.02    |                                             | .                   | .       | .             | .                                 |
| Mean     | 2) <i>Dmp1-Cre</i>                          | 6 | 0.22  | 0.03    |                                             | .                   | .       | .             | .                                 |
| Mean     | 3) <i>Tnfrsf11b</i> <sup>f/f</sup>          | 5 | 0.20  | 0.03    |                                             | .                   | .       | .             | .                                 |
| Mean     | 4) <i>Dmp1-Cre;Tnfrsf11b</i> <sup>f/f</sup> | 6 | 0.13  | 0.02    |                                             | .                   | .       | .             | .                                 |
| Diff     | 1) <i>Tnfrsf11b</i> <sup>+/+</sup>          | . | .     | .       | 2) <i>Dmp1-Cre</i>                          | -0.02               | 0.2311  | 0.6119        | 0.9769                            |
| Diff     | 1) <i>Tnfrsf11b</i> <sup>+/+</sup>          | . | .     | .       | 3) <i>Tnfrsf11b</i> <sup>f/f</sup>          | 0.00                | 0.8874  | 0.9989        | 1.0000                            |
| Diff     | 1) <i>Tnfrsf11b</i> <sup>+/+</sup>          | . | .     | .       | 4) <i>Dmp1-Cre;Tnfrsf11b</i> <sup>f/f</sup> | 0.07                | 0.0001* | 0.0006*       | 0.0618                            |
| Diff     | 2) <i>Dmp1-Cre</i>                          | . | .     | .       | 3) <i>Tnfrsf11b</i> <sup>f/f</sup>          | 0.02                | 0.2015  | 0.5602        | 0.9769                            |
| Diff     | 2) <i>Dmp1-Cre</i>                          | . | .     | .       | 4) <i>Dmp1-Cre;Tnfrsf11b</i> <sup>f/f</sup> | 0.09                | <.0001* | <.0001*       | 0.0618                            |
| Diff     | 3) <i>Tnfrsf11b</i> <sup>f/f</sup>          | . | .     | .       | 4) <i>Dmp1-Cre;Tnfrsf11b</i> <sup>f/f</sup> | 0.07                | 0.0003* | 0.0015*       | 0.0627                            |
| Contrast | (1-2)-(3-4)                                 | . | -0.09 | 0.02    |                                             | .                   | 0.0007* | .             | .                                 |

**Supplementary Figure 4B, right panel: One-way ANOVA: Female L4 Cancellous BV/TV = Genotype : Means, SD, n, paired differences and p-values**

For female L4 cancellous BV/TV in Supplementary Figure 4B, right panel, by the Tukey p-values, *Tnfrsf11b*<sup>+/+</sup> has significantly higher values on average than *Dmp1-Cre;Tnfrsf11b*<sup>f/f</sup> ( $p < 0.0001$ ). *Dmp1-Cre* has significantly higher values on average than *Dmp1-Cre;Tnfrsf11b*<sup>f/f</sup> ( $p < 0.0001$ ). *Tnfrsf11b*<sup>f/f</sup> has significantly higher values on average than *Dmp1-Cre;Tnfrsf11b*<sup>f/f</sup> ( $p < 0.0001$ ).

The (1-2)-(3-4) difference of differences contrast is not statistically significant ( $p = 0.0982$ ).

| Type     | Test/Level of geno                          | n | Mean  | Std Dev | 2nd level of geno                           | Difference of means | p-value | Tukey p-value | Adjusted DSCF p-value (nonparam.) |
|----------|---------------------------------------------|---|-------|---------|---------------------------------------------|---------------------|---------|---------------|-----------------------------------|
| Test     | S-W Normality, observed                     | . | .     | .       |                                             | .                   | 0.0107* | .             | .                                 |
| Test     | S-W Normality, residuals                    | . | .     | .       |                                             | .                   | 0.3366  | .             | .                                 |
| Test     | Equal variance test                         | . | .     | .       |                                             | .                   | 0.3243  | .             | .                                 |
| Mean     | 1) <i>Tnfrsf11b</i> <sup>+/+</sup>          | 6 | 0.16  | 0.01    |                                             | .                   | .       | .             | .                                 |
| Mean     | 2) <i>Dmp1-Cre</i>                          | 6 | 0.18  | 0.02    |                                             | .                   | .       | .             | .                                 |
| Mean     | 3) <i>Tnfrsf11b</i> <sup>f/f</sup>          | 5 | 0.17  | 0.02    |                                             | .                   | .       | .             | .                                 |
| Mean     | 4) <i>Dmp1-Cre;Tnfrsf11b</i> <sup>f/f</sup> | 9 | 0.08  | 0.01    |                                             | .                   | .       | .             | .                                 |
| Diff     | 1) <i>Tnfrsf11b</i> <sup>+/+</sup>          | . | .     | .       | 2) <i>Dmp1-Cre</i>                          | -0.01               | 0.2021  | 0.5636        | 0.9978                            |
| Diff     | 1) <i>Tnfrsf11b</i> <sup>+/+</sup>          | . | .     | .       | 3) <i>Tnfrsf11b</i> <sup>f/f</sup>          | -0.01               | 0.3379  | 0.7622        | 0.9978                            |
| Diff     | 1) <i>Tnfrsf11b</i> <sup>+/+</sup>          | . | .     | .       | 4) <i>Dmp1-Cre;Tnfrsf11b</i> <sup>f/f</sup> | 0.08                | <.0001* | <.0001*       | 0.0239*                           |
| Diff     | 2) <i>Dmp1-Cre</i>                          | . | .     | .       | 3) <i>Tnfrsf11b</i> <sup>f/f</sup>          | 0.00                | 0.7867  | 0.9926        | 0.9978                            |
| Diff     | 2) <i>Dmp1-Cre</i>                          | . | .     | .       | 4) <i>Dmp1-Cre;Tnfrsf11b</i> <sup>f/f</sup> | 0.09                | <.0001* | <.0001*       | 0.0239*                           |
| Diff     | 3) <i>Tnfrsf11b</i> <sup>f/f</sup>          | . | .     | .       | 4) <i>Dmp1-Cre;Tnfrsf11b</i> <sup>f/f</sup> | 0.09                | <.0001* | <.0001*       | 0.0287*                           |
| Contrast | (1-2)-(3-4)                                 | . | -0.10 | 0.01    |                                             | .                   | <.0001* | .             | .                                 |

**Supplementary Figure 4C: One-way ANOVA: Rank-Transformed Male Femur Ct. Th. = Genotype : Means, SD, n, paired differences and p-values**

For Rank-Transformed male femur cortical thickness in Supplementary Figure 4C, by the Tukey p-values, there are no statistically significant pairwise comparisons.

The (1-2)-(3-4) difference of differences contrast is not statistically significant (p=0.0762).

| Type     | Test/Level of geno                 | n | Mean  | Std Dev | 2nd level of geno                  | Difference of means | p-value | Tukey p-value | Adjusted DSCF p-value (nonparam.) |
|----------|------------------------------------|---|-------|---------|------------------------------------|---------------------|---------|---------------|-----------------------------------|
| Test     | S-W Normality, observed            | . | .     | .       |                                    | .                   | 0.6294  | .             | .                                 |
| Test     | S-W Normality, residuals           | . | .     | .       |                                    | .                   | 0.1007  | .             | .                                 |
| Test     | Equal variance test                | . | .     | .       |                                    | .                   | 0.3243  | .             | .                                 |
| Mean     | 1)Tnfrsf11b <sup>+/+</sup>         | 6 | 11.17 | 4.07    |                                    | .                   | .       | .             | .                                 |
| Mean     | 2)Dmp1-Cre                         | 6 | 9.83  | 5.71    |                                    | .                   | .       | .             | .                                 |
| Mean     | 3)Tnfrsf11b <sup>ff</sup>          | 2 | 14.50 | 0.71    |                                    | .                   | .       | .             | .                                 |
| Mean     | 4)Dmp1-Cre;Tnfrsf11b <sup>ff</sup> | 4 | 4.00  | 4.08    |                                    | .                   | .       | .             | .                                 |
| Diff     | 1)Tnfrsf11b <sup>+/+</sup>         | . | .     | .       | 2)Dmp1-Cre                         | 1.33                | 0.6234  | 0.9572        | 0.9096                            |
| Diff     | 1)Tnfrsf11b <sup>+/+</sup>         | . | .     | .       | 3)Tnfrsf11b <sup>ff</sup>          | -3.33               | 0.3897  | 0.8113        | 0.8124                            |
| Diff     | 1)Tnfrsf11b <sup>+/+</sup>         | . | .     | .       | 4)Dmp1-Cre;Tnfrsf11b <sup>ff</sup> | 7.17                | 0.0301* | 0.1199        | 0.4985                            |
| Diff     | 2)Dmp1-Cre                         | . | .     | .       | 3)Tnfrsf11b <sup>ff</sup>          | -4.67               | 0.2344  | 0.6116        | 0.9096                            |
| Diff     | 2)Dmp1-Cre                         | . | .     | .       | 4)Dmp1-Cre;Tnfrsf11b <sup>ff</sup> | 5.83                | 0.0696  | 0.2470        | 0.4985                            |
| Diff     | 3)Tnfrsf11b <sup>ff</sup>          | . | .     | .       | 4)Dmp1-Cre;Tnfrsf11b <sup>ff</sup> | 10.50               | 0.0196* | 0.0815        | 0.4985                            |
| Contrast | (1-2)-(3-4)                        | . | -9.17 | 4.79    |                                    | .                   | 0.0762  | .             | .                                 |

**Supplementary Figure 4D, left panel: One-way ANOVA: Male Femur Cancellous BV/TV = Genotype : Means, SD, n, paired differences and p-values**

For male femur cancellous BV/TV in Supplementary Figure 4D, left panel, by the Tukey p-values, Tnfrsf11b<sup>+/+</sup> has significantly higher values on average than Dmp1-Cre;Tnfrsf11b<sup>f/f</sup> (p=0.0045). Dmp1-Cre has significantly higher values on average than Dmp1-Cre;Tnfrsf11b<sup>f/f</sup> (p=0.0384).

The (1-2)-(3-4) difference of differences contrast is not statistically significant (p=0.0534).

| Type     | Test/Level of geno                  | n | Mean  | Std Dev | 2nd level of geno                   | Difference of means | p-value | Tukey p-value | Adjusted DSCF p-value (nonparam.) |
|----------|-------------------------------------|---|-------|---------|-------------------------------------|---------------------|---------|---------------|-----------------------------------|
| Test     | S-W Normality, observed             | . | .     | .       |                                     | .                   | 0.4739  | .             | .                                 |
| Test     | S-W Normality, residuals            | . | .     | .       |                                     | .                   | 0.2195  | .             | .                                 |
| Test     | Equal variance test                 | . | .     | .       |                                     | .                   | 0.3442  | .             | .                                 |
| Mean     | 1)Tnfrsf11b <sup>+/+</sup>          | 6 | 0.05  | 0.01    |                                     | .                   | .       | .             | .                                 |
| Mean     | 2)Dmp1-Cre                          | 6 | 0.05  | 0.01    |                                     | .                   | .       | .             | .                                 |
| Mean     | 3)Tnfrsf11b <sup>f/f</sup>          | 2 | 0.05  | 0.00    |                                     | .                   | .       | .             | .                                 |
| Mean     | 4)Dmp1-Cre;Tnfrsf11b <sup>f/f</sup> | 4 | 0.03  | 0.01    |                                     | .                   | .       | .             | .                                 |
| Diff     | 1)Tnfrsf11b <sup>+/+</sup>          | . | .     | .       | 2)Dmp1-Cre                          | 0.00                | 0.7166  | 0.9819        | 0.9951                            |
| Diff     | 1)Tnfrsf11b <sup>+/+</sup>          | . | .     | .       | 3)Tnfrsf11b <sup>f/f</sup>          | -0.00               | 0.7848  | 0.9921        | 0.9951                            |
| Diff     | 1)Tnfrsf11b <sup>+/+</sup>          | . | .     | .       | 4)Dmp1-Cre;Tnfrsf11b <sup>f/f</sup> | 0.02                | 0.0045* | 0.0206*       | 0.1543                            |
| Diff     | 2)Dmp1-Cre                          | . | .     | .       | 3)Tnfrsf11b <sup>f/f</sup>          | -0.00               | 0.5975  | 0.9476        | 0.9951                            |
| Diff     | 2)Dmp1-Cre                          | . | .     | .       | 4)Dmp1-Cre;Tnfrsf11b <sup>f/f</sup> | 0.02                | 0.0087* | 0.0384*       | 0.1543                            |
| Diff     | 3)Tnfrsf11b <sup>f/f</sup>          | . | .     | .       | 4)Dmp1-Cre;Tnfrsf11b <sup>f/f</sup> | 0.02                | 0.0147* | 0.0627        | 0.4985                            |
| Contrast | (1-2)-(3-4)                         | . | -0.02 | 0.01    |                                     | .                   | 0.0534  | .             | .                                 |

**Supplementary Figure 4D, right panel: One-way ANOVA: Male L4 Cancellous BV/TV = Genotype : Means, SD, n, paired differences and p-values**

For male L4 cancellous BV/TV in Supplementary Figure 4D, right panel, by the Tukey p-values, *Tnfrsf11b*<sup>+/+</sup> has significantly higher values on average than *Dmp1-Cre;Tnfrsf11b*<sup>f/f</sup> (p<0.0001). *Dmp1-Cre* has significantly higher values on average than *Dmp1-Cre;Tnfrsf11b*<sup>f/f</sup> (p<0.0001). *Tnfrsf11b*<sup>+/+</sup> has significantly higher values on average than *Dmp1-Cre;Tnfrsf11b*<sup>f/f</sup> (p<0.0001).

The (1-2)-(3-4) difference of differences contrast is also statistically significant (p<0.0001).

| Type     | Test/Level of geno                          | n | Mean  | Std Dev | 2nd level of geno                           | Difference of means | p-value | Tukey p-value | Adjusted DSCF p-value (nonparam.) |
|----------|---------------------------------------------|---|-------|---------|---------------------------------------------|---------------------|---------|---------------|-----------------------------------|
| Test     | S-W Normality, observed                     | . | .     | .       |                                             | .                   | 0.0074* | .             | .                                 |
| Test     | S-W Normality, residuals                    | . | .     | .       |                                             | .                   | 0.5219  | .             | .                                 |
| Test     | Equal variance test                         | . | .     | .       |                                             | .                   | 0.3809  | .             | .                                 |
| Mean     | 1) <i>Tnfrsf11b</i> <sup>+/+</sup>          | 6 | 0.18  | 0.02    |                                             | .                   | .       | .             | .                                 |
| Mean     | 2) <i>Dmp1-Cre</i>                          | 6 | 0.20  | 0.03    |                                             | .                   | .       | .             | .                                 |
| Mean     | 3) <i>Tnfrsf11b</i> <sup>f/f</sup>          | 3 | 0.18  | 0.02    |                                             | .                   | .       | .             | .                                 |
| Mean     | 4) <i>Dmp1-Cre;Tnfrsf11b</i> <sup>f/f</sup> | 4 | 0.08  | 0.00    |                                             | .                   | .       | .             | .                                 |
| Diff     | 1) <i>Tnfrsf11b</i> <sup>+/+</sup>          | . | .     | .       | 2) <i>Dmp1-Cre</i>                          | -0.02               | 0.1603  | 0.4745        | 0.8762                            |
| Diff     | 1) <i>Tnfrsf11b</i> <sup>+/+</sup>          | . | .     | .       | 3) <i>Tnfrsf11b</i> <sup>f/f</sup>          | 0.00                | 0.7571  | 0.9887        | 1.0000                            |
| Diff     | 1) <i>Tnfrsf11b</i> <sup>+/+</sup>          | . | .     | .       | 4) <i>Dmp1-Cre;Tnfrsf11b</i> <sup>f/f</sup> | 0.10                | <.0001* | <.0001*       | 0.1543                            |
| Diff     | 2) <i>Dmp1-Cre</i>                          | . | .     | .       | 3) <i>Tnfrsf11b</i> <sup>f/f</sup>          | 0.02                | 0.1491  | 0.4501        | 0.8762                            |
| Diff     | 2) <i>Dmp1-Cre</i>                          | . | .     | .       | 4) <i>Dmp1-Cre;Tnfrsf11b</i> <sup>f/f</sup> | 0.12                | <.0001* | <.0001*       | 0.1543                            |
| Diff     | 3) <i>Tnfrsf11b</i> <sup>f/f</sup>          | . | .     | .       | 4) <i>Dmp1-Cre;Tnfrsf11b</i> <sup>f/f</sup> | 0.10                | <.0001* | <.0001*       | 0.2925                            |
| Contrast | (1-2)-(3-4)                                 | . | -0.11 | 0.02    |                                             | .                   | <.0001* | .             | .                                 |



**Supplementary Figure 4F: Two-sample tests within tissue types**

A paired t-test on samples measured from the same 5 animals shows bone tissue has significantly higher *Tnfrsf11b*<sup>+/+</sup> gene expression than muscle tissue (mean difference of 8.75, p=0.0025)

| <i>Analysis Variable</i>                 | <i>Difference</i> | <i>n</i> | <i>Mean</i> | <i>unadjusted p-value</i> |
|------------------------------------------|-------------------|----------|-------------|---------------------------|
| Tnfrsf11b <sup>+/+</sup> Gene Expression | Bone - Muscle     | 5        | 8.75        | 0.0025                    |
